# Supplementary material for: Genome-wide analysis reveals the association between alternative splicing and DNA methylation across human solid tumors
Source: BMC Med Genomics. 2020 Jan 6;13:4. doi: 10.1186/s12920-019-0654-9 (PMC6945449; doi:10.1186/s12920-019-0654-9)
Supplement: Supplementary file 1 — Additional file 1: Table S1. The number of samples from TCGA SpliceSeq and TCGA we used in the analyses. Table S2. The number and distribution of cancer-specific AS events across different cancers. Table S3. The number and distribution of AS-associated CpGs across different cancers. Table S4. Correlation of cancer-specific AS and DNA methylation in tumor tissues and normal tissues. Table S5. GO biological processes that were enriched by genes harboring differentially regulated exon in ten human cancers. Table S6. KEGG pathway enrichment of genes with methylation-related cancer-specific AS events across ten human cancer types. [file 12920_2019_654_MOESM1_ESM.xlsx]

## Sheet: Tab S1
Tab S1. Number of samples from TCGA SpliceSeq and TCGA we used in the analyses.
		TCGA SpliceSeq			TCGA methyaltion data
Acronym	Tumor type	Paired samples	Unpaired tumor samples		Paired samples	Unpaired tumor samples
BRCA	Breast Invasive Carcinoma	113	1094		92	1050
COAD	Colon adenocarcinoma	41	458		38	367
HNSC	Head and neck squamous cell carcinoma	43	501		50	482
KIRC	Kidney renal clear cell carcinoma	72	533		160	160
KIRP	Kidney renal papillary carcinoma	32	290		45	231
LIHC	Liver hepatocellular carcinoma	50	371		50	329
LUAD	Lung adenocarcinoma	57	514		29	434
LUSC	Lung squamous cell carcinoma	49	501		71	765
PRAD	Prostate adenocarcinoma	52	497		50	449
THCA	Thyroid carcinoma	71	517		56	459

## Sheet: Tab S2
Tab S2. The number and distribution of cancer-specific AS events across different cancers
Tumor type	Number of paired samples	No. of AS events changed in cancer vs. normal	AA(%)	AD(%)	AP(%)	AT(%)	ES(%)	ME(%)	RI(%)
BRAC	113	2030	98(4.8)	88(4.3)	827(40.7)	98(4.8)	761(37.5)	16(0.8)	142(7.0)
COAD	41	698	22(3.2)	37(5.3)	255(36.5)	163(23.4)	151(21.6)	3(0.4)	67(9.6)
HNSC	43	1602	57(3.6)	53(3.3)	574(35.8)	428(26.7)	424(26.5)	5(0.3)	61(3.8)
KIRC	72	2678	81(3.0)	91(3.4)	1190(44.4)	535(20.0)	611(22.8)	12(0.4)	158(5.9)
KIRP	32	1429	57(4.0)	74(5.2)	692(48.4)	468(32.8)	31(2.2)	8(0.6)	99(6.9)
LIHC	50	1165	45(3.9)	42(3.6)	388(33.3)	320(27.5)	290(24.9)	5(0.4)	75(6.4)
LUAD	57	2212	79(3.6)	87(3.9)	860(38.9)	495(22.4)	565(25.5)	13(0.6)	113(5.1)
LUSC	49	2035	118(5.8)	163(8)	1314(64.6)	232(11.4)	53(2.6)	18(0.9)	137(6.7)
PRAD	52	943	11(1.2)	25(2.7)	419(44.4)	191(20.3)	234(24.8)	5(0.5)	58(6.2)
THCA	71	1026	34(3.3)	37(3.6)	448(43.7)	215(21.0)	228(22.2)	12(1.2)	52(5.1)

## Sheet: Tab S3
Tab S3. The number and distribution of AS-associated CpGs across different cancers
Tumor type	Number of paired samples	No. of CpGs changed in cancer vs. normal	AA(%)	AD(%)	AP(%)	AT(%)	ES(%)	ME(%)	RI(%)
BRAC	92	72	5(6.9)	4(5.6)	51(70.8)	0(0.0)	7(9.7)	0(0.0)	5(6.9)
COAD	38	102	1(1.0)	0(0.0)	76(74.5)	14(13.7)	5(4.9)	0(0.0)	6(5.9)
HNSC	50	128	5(3.9)	1(0.8)	81(63.3)	15(11.7)	14(10.9)	0(0.0)	12(9.4)
KIRC	160	250	5(2.0)	3(1.2)	186(74.4)	23(9.2)	15(6.0)	0(0.0)	18(7.2)
KIRP	45	134	14(10.4)	1(0.7)	76(56.7)	22(16.4)	2(1.5)	0(0.0)	19(14.2)
LIHC	50	22	0(0.0)	1(4.5)	15(68.2)	5(22.7)	0(0.0)	0(0.0)	1(4.5)
LUAD	29	31	2(6.5)	2(6.5)	20(64.5)	3(9.7)	1(3.2)	0(0.0)	3(9.7)
LUSC	71	236	12(5.1)	5(2.1)	197(83.5)	3(1.3)	3(1.3)	0(0.0)	16(6.8)
PRAD	50	156	0.0(0.0)	2(1.3)	95(60.9)	12(7.7)	19(12.2)	0(0.0)	28(17.9)
THCA	56	49	6(12.2)	2(4.1)	36(73.5)	0(0.0)	0(0.0)	0(0.0)	5(10.2)

## Sheet: Tab S4
Tab S4. Correlation of cancer-specific AS and DNA methylation in tumor tissues and normal tissues.
Tumor type	CpG	Chr	Location	as_id in TCGA SpingSeq	exons	splice_type	symbol	Correlations in tumor tissues					Correlations in normal tissues
								β_tumor	P_tumor	FDR_tumor	P_tumor_permutation		r_normal	P_normal	FDR_normal	P_normal_permutation
BRAC	cg14515791	1	178310545	9074	4	AP	RASAL2	-0.26865	5.38311e-10	4.30648e-09	0.001		-0.397842	0.000214477	0.0019303	0.002
BRAC	cg22401939	1	206731166	9586	3	AP	RASSF5	-0.571174	4.58384e-08	2.53874e-07	0.001		0.0980205	0.377998	0.618542	0.384
BRAC	cg26896787	1	228603707	10210	2.1	AP	TRIM17	0.832639	1.73984e-09	1.14532e-08	0.001		0.0322228	0.810236	0.877185	0.794
BRAC	cg24289912	10	129845739	13457	6	AP	PTPRE	-0.523212	1.74979e-09	1.14532e-08	0.001		-0.368948	0.000820212	0.0065617	0.002
BRAC	cg17052466	11	2423382	13923	2	ES	TSSC4	0.136417	0.0146581	0.0293163	0.018		0.0257324	0.816269	0.877185	0.813
BRAC	cg17063929	11	89224799	18227	5	AP	NOX4	-0.154059	0.0463884	0.0814626	0.045		0.264509	0.0581003	0.149401	0.062
BRAC	cg17524180	13	113633600	26317	8	AP	MCF2L	-0.227399	0.00153151	0.00393817	0.002		-0.3038	0.00496375	0.023826	0.005
BRAC	cg20742385	13	113633654	26317	8	AP	MCF2L	-0.173635	0.00702861	0.0148841	0.007		-0.399328	0.000167973	0.0019303	<0.001
BRAC	cg06958211	15	40532180	29958	2	AP	PAK6	-0.267221	8.40251e-09	5.04151e-08	0.001		-0.36225	0.00151602	0.0109154	0.003
BRAC	cg06794543	15	42749748	30163	4.1	AP	ZNF106	-0.19602	0.000360308	0.00103769	0.001		-0.451538	2.95653e-05	0.000532175	<0.001
BRAC	cg05705549	16	5094341	33878	9.1	AA	C16orf89	-0.299436	0.000512609	0.00141953	0.001		-0.0311851	0.778248	0.877185	0.791
BRAC	cg00005112	16	69958840	37313	15.1	AP	WWP2	-0.81467	9.63087e-33	3.46711e-31	0.001		-0.407565	0.000119133	0.00171551	<0.001
BRAC	cg09419444	16	69958792	37313	15.1	AP	WWP2	-0.680396	4.52328e-33	3.25676e-31	0.001		-0.329253	0.00222677	0.0133606	0.002
BRAC	cg06716730	17	35851459	40523	2	AP	DUSP14	-0.0498001	0.00699363	0.0148841	0.018		0.0621956	0.574092	0.728599	0.581
BRAC	cg12783819	17	75369657	43715	8	AP	SEPT9	-0.149621	3.83271e-12	3.94222e-11	0.001		-0.308827	0.0042598	0.0219075	0.004
BRAC	cg16317901	17	75283800	43726	3.1	AP	SEPT9	-0.169713	0.0277835	0.0540652	0.021		-0.58303	5.91329e-09	2.12879e-07	<0.001
BRAC	cg17752015	17	80186763	44300	2	AP	SLC16A3	-0.165567	0.0345705	0.065502	0.033		0.0117471	0.915539	0.969394	0.917
BRAC	cg25374649	18	13611400	44737	5.1	AP	LDLRAD4	-0.301993	2.02116e-06	7.27616e-06	0.001		0.0276998	0.806092	0.877185	0.817
BRAC	cg01743901	19	12936741	47875	9.1	AA	RTBDN	-0.594656	1.28896e-06	4.88446e-06	0.001		-0.0767356	0.490502	0.702343	0.486
BRAC	cg15602548	2	54786148	53577	3	AP	SPTBN1	-0.460859	2.38157e-05	7.79422e-05	0.001		-0.709774	4.07651e-14	2.93509e-12	<0.001
BRAC	cg24129222	2	74643251	54051	2.1	AP	C2orf81	-0.584716	4.8575e-20	1.1658e-18	0.001		0.0642774	0.561317	0.728599	0.554
BRAC	cg16331051	2	75788552	54148	2	AP	EVA1A	0.237608	8.69954e-06	2.9827e-05	0.001		0.249148	0.0323029	0.0969088	0.042
BRAC	cg05056497	21	35899448	60494	5	AP	RCAN1	-0.237581	0.00183616	0.00455873	0.001		-0.175197	0.110936	0.257658	0.108
BRAC	cg00615377	22	36236649	61982	3	AP	RBFOX2	-0.489118	1.29432e-18	2.32978e-17	0.001		-0.0328357	0.766837	0.877185	0.786
BRAC	cg26196531	22	36236656	61982	3	AP	RBFOX2	-0.514943	4.22847e-15	6.089e-14	0.001		0.00322982	0.976738	0.992823	0.976
BRAC	cg12251779	22	45608440	62645	5.1	AP	KIAA0930	-0.0865391	0.0426747	0.0768144	0.047		0.0903725	0.413619	0.636748	0.437
BRAC	cg13895323	22	50528641	62786	2.3:2.4	AD	MOV10L1	0.661658	5.09999e-12	4.58999e-11	0.001		0.0273343	0.805051	0.877185	0.803
BRAC	cg00382999	3	136649333	66941	3	AP	NCK1	-0.178099	0.00317973	0.00715439	0.006		-0.165357	0.132792	0.289727	0.123
BRAC	cg17466131	4	186578190	71370	15	AP	SORBS2	-0.213669	0.0403261	0.0744482	0.044		0.506151	9.02587e-07	2.16621e-05	<0.001
BRAC	cg25391117	5	34043284	71706	1.2	AD	C1QTNF3	0.496713	2.7301e-05	8.54641e-05	0.001		0.252313	0.0425933	0.12237	0.04
BRAC	cg09179916	5	38445834	71837	20.1	AP	EGFLAM	-0.316539	4.46182e-07	1.78473e-06	0.001		0.129535	0.240244	0.450459	0.218
BRAC	cg21201393	5	38445522	71837	20.1	AP	EGFLAM	-0.320501	9.0517e-08	4.65516e-07	0.001		0.193043	0.0785181	0.191435	0.089
BRAC	cg18260397	5	154230438	74223	3	AP	FAXDC2	-0.390463	2.11777e-07	1.01653e-06	0.001		0.0538431	0.626656	0.777918	0.602
BRAC	cg12695465	6	10556147	75295	7	AP	GCNT2	-0.179854	0.000203965	0.000611894	0.001		-0.132408	0.238658	0.450459	0.225
BRAC	cg13411789	6	10528492	75298	6.1	AP	GCNT2	-0.610672	3.44268e-07	1.49833e-06	0.001		-0.166679	0.136957	0.290026	0.156
BRAC	cg25747783	7	105603622	81315	2	AP	CDHR3	-0.677668	7.33384e-15	8.80061e-14	0.001		-0.404766	0.000196036	0.0019303	<0.001
BRAC	cg15664152	7	129008407	81744	3	AP	AHCYL2	-0.447473	3.53773e-07	1.49833e-06	0.001		0.0432696	0.697714	0.837256	0.725
BRAC	cg14028671	9	139937558	88260	2.1	AP	NPDC1	-0.512327	0.00286884	0.00666312	0.003		-0.278001	0.0104544	0.0376357	0.011
BRAC	cg18440824	X	23851466	88702	9.1	AA	APOO	0.0839134	0.0489985	0.0839975	0.046		0.0617558	0.576808	0.728599	0.563
BRAC	cg15141868	7	37959966	79272	3	AP	EPDR1	0.178762	0.00194033	0.00465679	0.004		0.0463637	0.675371	0.824181	0.659
BRAC	cg20150640	1	23697656	1054	1.5	RI	C1orf213	-0.197853	0.000532436	0.00141983	0.003		-0.300735	0.00573549	0.0238675	0.008
BRAC	cg22502492	1	23697506	1054	1.5	RI	C1orf213	-0.12633	0.0139129	0.0286208	0.012		-0.320327	0.0031544	0.0174705	0.003
COAD	cg12948621	19	37825446	49477	7	AP	HKR1	-0.491033	1.37032e-40	1.38403e-38	0.001		-0.266667	0.268642	0.722342	0.275
COAD	cg12024906	19	37825679	49477	7	AP	HKR1	-0.541332	9.15798e-37	2.31239e-35	0.001		-0.249123	0.302357	0.722342	0.313
COAD	cg05280698	19	37825388	49477	7	AP	HKR1	-0.505777	2.84557e-39	1.43701e-37	0.001		-0.261404	0.278493	0.722342	0.3
COAD	cg24834889	19	37825406	49477	7	AP	HKR1	-0.615551	1.00901e-38	3.397e-37	0.001		0.0701754	0.775723	0.911023	0.767
COAD	cg19023847	10	99344164	12728	1	AP	PI4K2A	-0.615336	3.69961e-26	7.47321e-25	0.001		0.59586	0.00709848	0.154871	0.006
COAD	cg13601799	9	21974704	86000	4.1	AP	CDKN2A	-0.498563	9.27345e-20	1.56103e-18	0.001		0.269013	0.28039	0.722342	0.278
COAD	cg10132917	7	30951801	79158	7.1	AP	AQP1	-0.446536	3.21383e-12	4.63709e-11	0.001		-0.0649123	0.792376	0.919885	0.805
COAD	cg07135629	7	30951709	79158	7.1	AP	AQP1	-0.492897	5.84359e-11	7.32716e-10	0.001		-0.461404	0.0483916	0.375966	0.05
COAD	cg02862467	1	19407897	875	103.1	AP	UBR4	-0.374765	6.52915e-11	7.32716e-10	0.001		-0.00877193	0.97413	0.9744	0.971
COAD	cg24544490	1	155290961	8077	1	AP	RUSC1	-0.0925047	0.0128737	0.0337808	0.014		-0.173684	0.475415	0.800283	0.498
COAD	cg04551925	7	30951740	79158	7.1	AP	AQP1	-0.401473	2.72553e-08	2.50253e-07	0.001		-0.121053	0.620653	0.836604	0.628
COAD	cg18273417	1	153518418	7711	2	AP	S100A4	-0.305463	1.70561e-07	1.32513e-06	0.001		-0.180702	0.457471	0.79663	0.46
COAD	cg11827925	7	30951498	79158	7.1	AP	AQP1	-0.28802	2.06539e-07	1.49003e-06	0.001		-0.608772	0.00670683	0.154871	0.005
COAD	cg20742385	13	113633654	26317	8	AP	MCF2L	-0.175816	0.000371824	0.00177063	0.001		0.0385965	0.87684	0.951347	0.872
COAD	cg01614883	3	38070934	64009	1	AP	PLCD1	-0.238727	6.34897e-09	6.41246e-08	0.001		-0.34386	0.149648	0.648326	0.148
COAD	cg26310551	14	24780540	26963	1	AP	LTB4R	-0.187664	1.67093e-07	1.32513e-06	0.001		0.430891	0.0655067	0.413511	0.064
COAD	cg20259129	1	206138116	9577	2	AT	FAM72A	-0.0993873	0.0315059	0.0723204	0.034		0.132514	0.588647	0.836604	0.557
COAD	cg18080604	7	30951492	79158	7.1	AP	AQP1	-0.252122	0.000188067	0.000949741	0.003		-0.149123	0.540955	0.825121	0.552
COAD	cg04372674	7	30951381	79158	7.1	AP	AQP1	-0.192333	0.000385681	0.00177063	0.003		-0.231579	0.338581	0.722342	0.339
COAD	cg25576711	14	24780557	26963	1	AP	LTB4R	-0.211626	2.97276e-07	2.00166e-06	0.001		0.0772269	0.753338	0.9058	0.731
COAD	cg15364618	14	24780551	26963	1	AP	LTB4R	-0.232935	5.062e-07	3.00742e-06	0.001		0.056165	0.819353	0.929828	0.812
COAD	cg13826459	14	94855505	29115	2.1:2.2:2.3:2.4	AA	SERPINA1	-0.222827	0.000155819	0.000828301	0.001		0.250877	0.298872	0.722342	0.298
COAD	cg04026675	9	21974514	86000	4.1	AP	CDKN2A	-0.314063	4.34871e-07	2.74513e-06	0.001		0.569066	0.0137113	0.154871	0.012
COAD	cg25230363	7	30951425	79158	7.1	AP	AQP1	-0.211522	0.00051357	0.00225524	0.002		-0.319298	0.182451	0.682503	0.177
COAD	cg25075794	7	30951392	79158	7.1	AP	AQP1	-0.157518	0.00397714	0.0136237	0.002		-0.368421	0.12127	0.583251	0.117
COAD	cg25790453	13	113633590	26317	8	AP	MCF2L	-0.114466	0.0311165	0.0723204	0.029		0.438596	0.0618138	0.413511	0.059
COAD	cg09968361	14	94855344	29104	2.2:2.3	RI	SERPINA1	-0.183245	9.34958e-05	0.000524615	0.001		-0.154412	0.55298	0.825121	0.545
COAD	cg19977232	4	54325479	69310	19	AT	FIP1L1	-0.191717	0.000829247	0.00335016	0.001		0.0570426	0.816576	0.929828	0.835
COAD	cg26923410	7	30951432	79158	7.1	AP	AQP1	-0.193903	0.0080583	0.0239379	0.007		-0.294737	0.219913	0.722342	0.223
COAD	cg01782486	1	154986512	7878	5	ES	ZBTB7B	0.101813	0.0186759	0.0460064	0.02		-0.177193	0.466398	0.79841	0.462
COAD	cg16075268	14	24779793	26958	1	AP	CIDEB	0.157898	0.000863463	0.00335422	0.001		-0.64502	0.00286411	0.144637	0.006
COAD	cg25318301	1	228566560	10196	118	AT	OBSCN	0.223377	0.00404664	0.0136237	0.004		-0.0817224	0.739441	0.899802	0.725
COAD	cg03669282	1	228566718	10196	118	AT	OBSCN	0.188425	0.00198549	0.00716194	0.001		0.107018	0.662204	0.868606	0.67
COAD	cg22877509	1	155290607	8077	1	AP	RUSC1	-0.123174	0.00582703	0.0183916	0.003		-0.103554	0.673116	0.869766	0.692
COAD	cg19516515	1	155290614	8077	1	AP	RUSC1	-0.125406	0.00702621	0.0215045	0.012		-0.0719298	0.770193	0.911023	0.793
COAD	cg24006126	1	155290813	8077	1	AP	RUSC1	-0.127641	0.0130441	0.0337808	0.011		-0.192982	0.426943	0.79663	0.416
COAD	cg09462826	11	61584773	16299	1	AP	FADS1	-0.165867	0.00064617	0.0027193	0.003		-0.261404	0.278493	0.722342	0.265
COAD	cg08574629	1	155290542	8077	1	AP	RUSC1	-0.115461	0.0124193	0.0337808	0.014		-0.122807	0.615534	0.836604	0.606
COAD	cg08170787	1	155290535	8077	1	AP	RUSC1	-0.121913	0.0174818	0.0441414	0.019		-0.182456	0.453041	0.79663	0.419
COAD	cg12569216	17	78041214	44018	12	AT	CCDC40	0.113014	0.0112643	0.0325055	0.009		0.230098	0.343291	0.722342	0.323
COAD	cg01411912	1	153517265	7713	4	AP	S100A4	-0.177876	0.00526875	0.0171659	0.004		0.301754	0.208723	0.722342	0.189
COAD	cg22601415	10	61900940	11845	28	AP	ANK3	-0.20307	0.0130287	0.0337808	0.008		-0.450877	0.0542717	0.391532	0.06
COAD	cg20707765	10	114133700	13111	1	AP	ACSL5	-0.0564166	0.0419716	0.094203	0.046		-0.573684	0.0115508	0.154871	0.016
COAD	cg05153345	14	21270575	26469	2.3:3.1	ES	RNASE1	-0.112403	0.00101704	0.00380448	0.002		-0.126316	0.60535	0.836604	0.603
COAD	cg07277017	11	1874093	13865	1	AP	LSP1	-0.0400722	0.0314354	0.0723204	0.028		-0.333333	0.16315	0.659126	0.161
HNSC	cg00382999	3	136649333	66941	3	AP	NCK1	-0.323149	8.17149e-11	1.9203e-10	0.001		0.118797	0.616865	0.900546	0.642
HNSC	cg00573623	12	3724731	19759	21	AT	EFCAB4B	0.218913	0.0177919	0.02534	0.016		0.723077	0.00480502	0.248868	0.007
HNSC	cg00692763	18	47088373	45485	2	AP	LIPG	-0.953717	1.76861e-81	8.31245e-80	0.001		0.137869	0.624139	0.900546	0.597
HNSC	cg01149192	5	180231058	75022	5	AP	MGAT1	-0.364637	1.44447e-11	3.57315e-11	0.001		-0.243609	0.299285	0.727573	0.31
HNSC	cg01200585	1	228362443	10193	2	AP	IBA57	-1.09272	9.41429e-76	1.32741e-74	0.001		-0.516464	0.0235775	0.433217	0.023
HNSC	cg01444716	20	11898557	58697	2.2	RI	BTBD3	-0.157314	0.00200754	0.00329143	0.003		-0.00150376	0.997464	0.997464	0.997
HNSC	cg01835695	5	180230959	75022	5	AP	MGAT1	-0.688795	1.69683e-17	6.29612e-17	0.001		-0.314286	0.176904	0.530711	0.176
HNSC	cg02090883	16	2762819	33295	6	AT	PRSS27	0.12282	0.0165331	0.0240327	0.019		0.162406	0.492298	0.788796	0.509
HNSC	cg02394812	15	44092488	30317	2.1	AP	HYPK	-0.1756	2.28842e-10	5.1217e-10	0.001		0.326808	0.159608	0.530711	0.162
HNSC	cg02865822	11	46383141	15542	4	AP	DGKZ	-0.066163	3.42576e-05	6.19273e-05	0.001		0.0303039	0.899079	0.997464	0.903
HNSC	cg02899346	19	45996372	50466	5	ES	RTN2	-0.188918	5.05423e-14	1.39735e-13	0.001		-0.416698	0.0675942	0.433217	0.07
HNSC	cg03471346	1	179112077	9102	2	AP	ABL2	-0.426902	8.07186e-19	3.44889e-18	0.001		-0.0110622	0.97006	0.997464	0.971
HNSC	cg03537810	8	145019067	85509	6	AP	PLEC	-0.0614506	1.86877e-05	3.56077e-05	0.001		-0.0460381	0.847168	0.997464	0.848
HNSC	cg03562414	19	52391078	51381	1.2:1.3	RI	ZNF577	0.223174	4.1599e-14	1.19703e-13	0.001		0.495227	0.0264058	0.433217	0.024
HNSC	cg04015907	20	825489	58466	4.1	AP	FAM110A	-0.240371	9.07705e-19	3.65676e-18	0.001		0.0278405	0.907247	0.997464	0.904
HNSC	cg04187185	5	43396953	71945	2	AP	CCL28	-0.505271	1.24673e-09	2.74671e-09	0.001		-0.442495	0.0578098	0.433217	0.058
HNSC	cg04212021	5	180231084	75022	5	AP	MGAT1	-0.517414	1.17379e-21	5.51683e-21	0.001		-0.362406	0.11691	0.530711	0.106
HNSC	cg04571847	19	24270007	48837	3	AP	ZNF254	-0.219961	3.52927e-08	7.53981e-08	0.001		-0.032343	0.892324	0.997464	0.896
HNSC	cg04682802	20	11898478	58697	2.2	RI	BTBD3	-0.160114	0.00339339	0.00525789	0.004		0.0300752	0.901328	0.997464	0.902
HNSC	cg05156901	22	51016646	62867	4	AP	CPT1B	-0.367255	4.31569e-18	1.64463e-17	0.001		-0.460784	0.0645388	0.433217	0.057
HNSC	cg05280698	19	37825388	49477	7	AP	HKR1	-0.733532	1.15308e-66	1.35487e-65	0.001		0.168421	0.476175	0.780705	0.48
HNSC	cg05822633	20	11898531	58697	2.2	RI	BTBD3	-0.175728	0.00307837	0.00484452	0.004		0.0270677	0.911407	0.997464	0.925
HNSC	cg05824218	17	38499096	40858	5	AP	RARA	-0.426256	2.81034e-36	1.88694e-35	0.001		-0.330827	0.154266	0.530711	0.164
HNSC	cg06045319	10	79395902	12279	2.2	AT	KCNMA1	0.161022	0.000214756	0.000383298	0.001		-0.342363	0.139518	0.530711	0.121
HNSC	cg06070445	3	187453772	68081	2	AP	BCL6	-0.154348	0.017218	0.0247729	0.013		0.0345865	0.886238	0.997464	0.889
HNSC	cg06360465	3	50341183	64992	4.1	AP	HYAL1	-0.18945	4.13165e-20	1.82051e-19	0.001		0.136842	0.563763	0.854737	0.576
HNSC	cg06530441	22	51016950	62867	4	AP	CPT1B	-0.122031	0.000256993	0.000452949	0.001		-0.35049	0.168044	0.530711	0.163
HNSC	cg07121644	11	46383031	15542	4	AP	DGKZ	-0.0555858	0.00135592	0.00227601	0.003		-0.00151519	0.994942	0.997464	0.998
HNSC	cg07690326	8	145019032	85509	6	AP	PLEC	-0.0618324	2.48074e-07	5.14389e-07	0.001		-0.172077	0.468183	0.776634	0.444
HNSC	cg07858489	22	24999188	61430	2.1	AP	GGT1	0.558337	3.06781e-05	5.61768e-05	0.001		-0.489011	0.0928917	0.451646	0.102
HNSC	cg08161081	20	34327466	95934	5	ES	RBM39	0.149163	0.00309225	0.00484452	0.003		0.145455	0.673423	0.930909	0.656
HNSC	cg08360726	19	40871823	49889	4	ES	PLD3	-0.22732	1.21193e-13	3.2242e-13	0.001		-0.134804	0.605275	0.900546	0.605
HNSC	cg08841511	10	86184581	12406	5	AP	CCSER2	-0.583613	7.39759e-07	1.4691e-06	0.001		-0.0466165	0.846202	0.997464	0.837
HNSC	cg09777776	19	24269890	48837	3	AP	ZNF254	-0.28274	1.21667e-10	2.81229e-10	0.001		-0.327191	0.159091	0.530711	0.158
HNSC	cg10415767	17	17726759	39507	2	ES	SREBF1	-0.738878	2.2589e-58	1.99065e-57	0.001		-0.443024	0.0504286	0.433217	0.052
HNSC	cg10635122	19	52391090	51381	1.2:1.3	RI	ZNF577	0.223955	1.65685e-12	4.24757e-12	0.001		0.15135	0.52415	0.821168	0.498
HNSC	cg10770023	22	51016644	62867	4	AP	CPT1B	-0.35362	7.95524e-17	2.87613e-16	0.001		-0.492647	0.0465658	0.433217	0.053
HNSC	cg10802379	5	150400395	74123	2	ES	GPX3	0.46394	4.83828e-15	1.62428e-14	0.001		-0.00526316	0.985626	0.997464	0.983
HNSC	cg11038073	18	47088421	45485	2	AP	LIPG	-1.04559	3.87943e-81	1.3675e-79	0.001		0.449418	0.0928312	0.451646	0.115
HNSC	cg11066033	2	242556858	58392	3	AP	THAP4	-0.770958	3.46371e-93	4.88383e-91	0.001		-0.356391	0.123455	0.530711	0.127
HNSC	cg11269599	19	52391304	51381	1.2:1.3	RI	ZNF577	0.237982	3.33793e-14	9.80518e-14	0.001		0.499771	0.0248463	0.433217	0.025
HNSC	cg11956819	8	145019041	85509	6	AP	PLEC	-0.0589202	2.71267e-05	5.09982e-05	0.001		-0.195473	0.408857	0.773656	0.401
HNSC	cg12024906	19	37825679	49477	7	AP	HKR1	-0.691958	9.80767e-58	7.68268e-57	0.001		0.115789	0.625911	0.900546	0.603
HNSC	cg12948621	19	37825446	49477	7	AP	HKR1	-0.597244	4.95992e-63	5.3796e-62	0.001		0.136842	0.563763	0.854737	0.56
HNSC	cg13390441	9	132962957	87899	2	AP	NCS1	-0.118402	2.90139e-27	1.63638e-26	0.001		0.410862	0.0719317	0.440973	0.08
HNSC	cg13445984	19	53117087	51483	10.4	AT	ZNF83	0.514989	5.40011e-26	2.92852e-25	0.001		0.0180451	0.941717	0.997464	0.938
HNSC	cg14118465	14	105958792	29653	8	AT	CRIP1	-0.155284	0.013571	0.0199325	0.018		-0.0496241	0.836247	0.997464	0.828
HNSC	cg14254867	18	47088432	45485	2	AP	LIPG	-1.00939	1.98766e-84	1.4013e-82	0.001		0.499106	0.0582188	0.433217	0.068
HNSC	cg14320593	18	47088343	45485	2	AP	LIPG	-0.913742	3.58675e-78	6.32165e-77	0.001		0.0483438	0.864153	0.997464	0.869
HNSC	cg14529758	19	5846599	46949	2.1	AA	FUT3	-0.129429	0.0251598	0.0354754	0.022		0.403509	0.0878198	0.451646	0.082
HNSC	cg15677957	18	47088780	45485	2	AP	LIPG	-0.894206	3.89553e-79	9.15449e-78	0.001		-0.0322004	0.909301	0.997464	0.908
HNSC	cg16559243	5	38445612	71837	20.1	AP	EGFLAM	-0.692706	3.19491e-14	9.58472e-14	0.001		-0.367841	0.195679	0.563077	0.185
HNSC	cg16885600	17	3416326	38442	20.2	AT	TRPV3	0.343239	2.87453e-05	5.33301e-05	0.001		0.0511278	0.831278	0.997464	0.85
HNSC	cg17268801	19	24269968	48837	3	AP	ZNF254	-0.21086	4.45004e-06	8.71466e-06	0.001		-0.200075	0.397692	0.773656	0.419
HNSC	cg17382841	5	38445614	71837	20.1	AP	EGFLAM	-0.814189	1.68789e-10	3.8386e-10	0.001		-0.264027	0.361702	0.74477	0.339
HNSC	cg17382990	11	1857531	13859	7.2	RI	SYT8	0.262044	0.000935278	0.00158885	0.003		0.288722	0.216276	0.586441	0.188
HNSC	cg17777592	13	49975418	25885	4.1	AP	CAB39L	-0.402209	7.35065e-11	1.75668e-10	0.001		0.315789	0.174755	0.530711	0.174
HNSC	cg18170989	13	49975383	25885	4.1	AP	CAB39L	-0.294303	9.02542e-09	1.95782e-08	0.001		0.323308	0.164286	0.530711	0.182
HNSC	cg18277682	1	228362509	10193	2	AP	IBA57	-0.84174	1.97336e-80	5.56487e-79	0.001		-0.606224	0.0059328	0.248868	0.002
HNSC	cg19031575	19	45996439	50466	5	ES	RTN2	-0.235833	2.2027e-12	5.54609e-12	0.001		-0.258744	0.270669	0.706747	0.276
HNSC	cg19112186	22	51016638	62867	4	AP	CPT1B	-0.374325	8.45837e-19	3.50774e-18	0.001		-0.485294	0.0503219	0.433217	0.058
HNSC	cg19268695	1	111743411	4141	2	AP	DENND2D	-0.872027	3.67154e-30	2.15703e-29	0.001		0.174436	0.460327	0.776634	0.435
HNSC	cg19710662	1	15256222	730	3	AP	KAZN	-0.104235	0.000303531	0.000528368	0.001		-0.282061	0.228262	0.607264	0.196
HNSC	cg21201393	5	38445522	71837	20.1	AP	EGFLAM	-0.83968	1.63294e-24	8.223e-24	0.001		-0.420242	0.134627	0.530711	0.132
HNSC	cg21459545	X	153637814	90575	3.1	AP	DNASE1L1	-0.322185	1.13333e-13	3.07308e-13	0.001		-0.0639338	0.788866	0.997464	0.787
HNSC	cg21516478	5	150400328	74123	2	ES	GPX3	0.418069	7.52076e-15	2.41006e-14	0.001		-0.0105263	0.968384	0.997464	0.967
HNSC	cg21574400	18	47088309	45485	2	AP	LIPG	-1.00748	3.17498e-77	4.97413e-76	0.001		0.261415	0.346639	0.74477	0.336
HNSC	cg21770622	11	46383066	15542	4	AP	DGKZ	-0.0487348	9.63658e-06	1.86131e-05	0.001		0.0424255	0.859041	0.997464	0.879
HNSC	cg21898046	5	180231026	75022	5	AP	MGAT1	-0.548919	2.24557e-13	5.86342e-13	0.001		-0.317293	0.172625	0.530711	0.184
HNSC	cg22102688	5	180486155	75037	13	AT	BTNL9	0.687125	4.83544e-39	3.40899e-38	0.001		-0.121805	0.607873	0.900546	0.623
HNSC	cg22257574	9	135754383	87992	2	AP	C9orf9	-0.715863	4.56934e-21	2.07831e-20	0.001		0.0917293	0.700101	0.937454	0.696
HNSC	cg22348345	11	1857477	13859	7.2	RI	SYT8	0.304572	0.0019286	0.00319921	0.004		0.233083	0.321182	0.74477	0.331
HNSC	cg23497020	12	50616562	21688	4.1	AP	LIMA1	-0.980373	3.56571e-18	1.39657e-17	0.001		-0.554887	0.0123679	0.348774	0.014
HNSC	cg23708717	18	47793175	45503	19	AT	MBD1	0.419172	5.3126e-44	3.94251e-43	0.001		0.371429	0.107575	0.505603	0.114
HNSC	cg24363820	22	51016703	62867	4	AP	CPT1B	-0.318167	1.78784e-16	6.30213e-16	0.001		-0.348039	0.171196	0.530711	0.165
HNSC	cg24513433	18	47088234	45485	2	AP	LIPG	-0.733591	2.24438e-78	4.52082e-77	0.001		0.36136	0.185709	0.54552	0.178
HNSC	cg24834889	19	37825406	49477	7	AP	HKR1	-0.874141	6.08582e-61	5.72067e-60	0.001		0.215038	0.360934	0.74477	0.384
HNSC	cg24846680	1	228362309	10193	2	AP	IBA57	-1.06338	3.21919e-61	3.24219e-60	0.001		-0.6007	0.00653282	0.248868	0.004
HNSC	cg25091228	5	67586433	72291	9	AP	PIK3R1	-0.555063	6.26485e-15	2.05429e-14	0.001		-0.0917293	0.700101	0.937454	0.723
HNSC	cg25509871	19	40871557	49889	4	ES	PLD3	-0.392824	1.38214e-15	4.75321e-15	0.001		-0.105392	0.687298	0.937454	0.713
HNSC	cg25810247	13	108867154	26235	3	AP	LIG4	-0.0977167	0.00213952	0.0034675	0.003		0.407018	0.0849016	0.451646	0.088
HNSC	cg25817165	18	72167213	45816	2.2	AA	CNDP2	-0.14316	4.8886e-24	2.37687e-23	0.001		-0.2956	0.205746	0.570377	0.205
HNSC	cg25820257	19	45996644	50466	5	ES	RTN2	-0.264273	1.67314e-11	4.06746e-11	0.001		-0.245957	0.295886	0.727573	0.293
HNSC	cg26084439	7	99160261	80691	5.3	ES	ZNF655	-0.157817	0.000392599	0.000675078	0.001		0.292857	0.288741	0.727008	0.282
HNSC	cg26117023	2	74782096	54114	2	AP	DOK1	-0.466271	7.93885e-15	2.48751e-14	0.001		-0.180677	0.487713	0.788796	0.49
HNSC	cg26486070	22	25003675	61431	3	AP	GGT1	-0.787356	1.16737e-34	7.15647e-34	0.001		0.263736	0.383492	0.761583	0.381
HNSC	cg26489413	11	10476976	14345	3	AP	AMPD3	-0.596848	5.60288e-36	3.59094e-35	0.001		-0.0225564	0.92655	0.997464	0.918
HNSC	cg27113059	18	47088248	45485	2	AP	LIPG	-0.718545	2.84226e-58	2.3574e-57	0.001		0.24687	0.375069	0.755496	0.349
HNSC	cg27200006	22	25003854	61431	3	AP	GGT1	-0.722928	3.25181e-25	1.69816e-24	0.001		0.274725	0.363262	0.74477	0.324
HNSC	cg27607136	11	1857442	13859	7.2	RI	SYT8	0.311166	0.00504688	0.00773489	0.005		0.183459	0.437084	0.776634	0.454
HNSC	cg27631427	18	47088306	45485	2	AP	LIPG	-0.979432	1.30612e-71	1.67421e-70	0.001		-0.130591	0.642725	0.906242	0.632
HNSC	cg26084439	7	99160261	80690	5.3	ES	ZNF655	-0.0659849	5.4046e-07	1.08864e-06	0.001		-0.590977	0.00706009	0.248868	0.003
HNSC	cg26084439	7	99160261	80688	4:5.1:5.2:5.3	ES	ZNF655	-0.145354	0.0130609	0.0193851	0.012		-0.488305	0.028929	0.433217	0.042
HNSC	cg26084439	7	99160261	80689	4:5.2:5.3	ES	ZNF655	-0.180437	0.00707142	0.0107212	0.004		-0.0881755	0.727901	0.952353	0.713
HNSC	cg00292447	11	126276006	19395	5.1	AP	ST3GAL4	-0.0647514	0.00258647	0.00414423	0.004		0.0929825	0.704753	0.937454	0.71
HNSC	cg05055844	11	126275997	19395	5.1	AP	ST3GAL4	-0.0543855	0.00880193	0.0132029	0.009		0.0596491	0.809119	0.997464	0.824
KIRC	cg00619207	1	111743368	4141	2	AP	DENND2D	-0.305916	0.0103055	0.0199788	0.015		-0.373043	0.07339	0.185577	0.083
KIRC	cg00813560	1	6106358	362	7	AP	KCNAB2	-0.103974	0.0227076	0.0410034	0.027		-0.625559	0.00141137	0.0153791	<0.001
KIRC	cg00842549	17	46651920	42192	6.1	AP	HOXB3	0.145638	2.67553e-05	8.28891e-05	0.001		0.400522	0.052443	0.156339	0.049
KIRC	cg00856997	4	2366103	68557	2	AP	ZFYVE28	-1.12145	2.11954e-20	4.46517e-19	0.001		-0.33913	0.105377	0.242205	0.119
KIRC	cg01149192	5	180231058	75022	5	AP	MGAT1	-0.598055	7.06076e-17	1.1156e-15	0.001		-0.61796	0.00129104	0.0152276	<0.001
KIRC	cg01541443	7	30185315	79109	2	AP	C7orf41	-0.054912	0.0259608	0.0460876	0.027		-0.590435	0.0028617	0.0242389	0.002
KIRC	cg01574481	14	24641852	26881	1.2	RI	REC8	0.418323	0.000150751	0.000421571	0.001		0.212655	0.31845	0.510812	0.312
KIRC	cg02015909	16	67034437	36913	3.1	AP	CES4A	-0.864839	2.80538e-16	3.546e-15	0.001		-0.813648	0.00128246	0.0152276	0.002
KIRC	cg02044895	11	58343318	16010	2	AP	LPXN	-0.384846	2.72589e-23	7.17818e-22	0.001		-0.42087	0.0416782	0.136348	0.044
KIRC	cg02193580	X	135251444	90187	3.1	AP	FHL1	-0.204015	0.00197212	0.00441979	0.001		-0.485852	0.016085	0.0726121	0.021
KIRC	cg02585906	11	415088	13650	2	AP	SIGIRR	-0.264311	6.65308e-08	3.50395e-07	0.001		-0.383478	0.0652411	0.174714	0.055
KIRC	cg02633924	17	75315563	43723	6.1	AP	42987	-0.545482	0.00090976	0.00222856	0.004		-0.06	0.780447	0.868385	0.784
KIRC	cg02722214	10	121578137	13270	16	AP	INPP5F	-0.514306	4.30817e-07	1.94483e-06	0.001		-0.0543596	0.800827	0.880828	0.788
KIRC	cg02799880	13	99630462	26172	3	AP	DOCK9	-0.120821	0.0272344	0.0480785	0.025		-0.053913	0.802416	0.880828	0.803
KIRC	cg03041532	11	71711021	17481	1.7	RI	IL18BP	0.371872	1.00945e-07	5.22928e-07	0.001		0.234783	0.268195	0.448802	0.276
KIRC	cg03140412	11	415111	13650	2	AP	SIGIRR	-0.191825	1.02747e-07	5.23677e-07	0.001		-0.417391	0.0435308	0.138947	0.043
KIRC	cg03405983	8	143858548	85364	2	AP	LYNX1	-0.437116	0.000385891	0.00104224	0.001		-0.349565	0.0945877	0.223058	0.07
KIRC	cg03471346	1	179112077	9102	2	AP	ABL2	-0.286014	8.72408e-09	6.12624e-08	0.001		-0.360193	0.0996305	0.233209	0.103
KIRC	cg03562414	19	52391078	51381	1.2:1.3	RI	ZNF577	0.299704	2.6867e-11	2.17692e-10	0.001		0.291803	0.166496	0.32883	0.184
KIRC	cg03568017	17	75315503	43723	6.1	AP	42987	-0.601509	0.00105628	0.00252867	0.003		-0.00608696	0.978912	0.991636	0.976
KIRC	cg03813164	10	11059725	10730	2	AP	CELF2	-0.363932	0.000222306	0.000616218	0.001		-0.581211	0.00455656	0.0293851	0.003
KIRC	cg03847535	3	69812973	65585	3	AP	MITF	-0.150655	0.00880014	0.0173803	0.017		0.353537	0.0901242	0.217002	0.108
KIRC	cg04029159	11	415080	13650	2	AP	SIGIRR	-0.199436	4.85487e-07	2.13075e-06	0.001		-0.413913	0.0454484	0.142195	0.05
KIRC	cg04117801	17	46651867	42192	6.1	AP	HOXB3	0.172726	6.75979e-06	2.27244e-05	0.001		0.397478	0.0544319	0.159231	0.047
KIRC	cg04212021	5	180231084	75022	5	AP	MGAT1	-0.482985	5.44263e-20	1.07492e-18	0.001		-0.535769	0.00696855	0.040968	0.007
KIRC	cg04452095	17	75315868	43723	6.1	AP	42987	-0.515182	9.94054e-09	6.68342e-08	0.001		-0.0991304	0.643815	0.783186	0.63
KIRC	cg04650676	17	75315486	43723	6.1	AP	42987	-0.46368	0.000134839	0.00038044	0.002		-0.101348	0.637487	0.780798	0.616
KIRC	cg04767756	16	10652706	33987	2	AP	EMP2	-0.666916	4.92108e-26	1.55506e-24	0.001		-0.225217	0.288625	0.472567	0.297
KIRC	cg04992588	3	58563674	65462	4	AP	FAM107A	-0.0989587	0.00294681	0.0065013	0.003		0.217439	0.307425	0.498187	0.295
KIRC	cg05189570	11	27680480	14758	11.1	AP	BDNF	0.210438	0.0071103	0.0143112	0.007		-0.133766	0.561819	0.736659	0.573
KIRC	cg05387167	17	46629804	42193	9.1	AP	HOXB3	0.212715	9.05843e-06	2.98173e-05	0.001		0.336522	0.108213	0.243457	0.11
KIRC	cg05437446	13	113622743	26320	6	AP	MCF2L	-0.184806	1.15255e-15	1.30073e-14	0.001		-0.148696	0.486337	0.683033	0.52
KIRC	cg05555725	X	135251416	90187	3.1	AP	FHL1	-0.254349	0.0018739	0.00426009	0.003		-0.565521	0.00397706	0.0280273	0.005
KIRC	cg05577434	22	25003527	61431	3	AP	GGT1	-0.841079	3.2523e-08	1.9032e-07	0.001		-0.634465	0.000868804	0.0137271	0.002
KIRC	cg05711445	7	139528855	81964	5.1	AP	TBXAS1	-0.183953	0.00903046	0.0177244	0.005		-0.244836	0.248881	0.432124	0.225
KIRC	cg06045337	8	145013910	85516	9	AP	PLEC	-0.338812	3.00803e-05	9.22851e-05	0.001		-0.323478	0.123258	0.268617	0.127
KIRC	cg06070625	3	69812798	65585	3	AP	MITF	-0.173907	0.0370429	0.062933	0.048		0.594235	0.002199	0.0204378	0.004
KIRC	cg06120688	7	50772867	79720	10	ES	GRB10	0.140917	0.0281005	0.0487898	0.029		-0.136685	0.544155	0.720077	0.541
KIRC	cg06291428	11	57559063	16000	4.1:4.2:4.3	ES	CTNND1	-0.144902	8.64372e-05	0.000250589	0.001		-0.254893	0.229349	0.40946	0.218
KIRC	cg06395298	17	46651225	42192	6.1	AP	HOXB3	0.190328	0.00030313	0.000825769	0.001		0.383997	0.0639515	0.172724	0.067
KIRC	cg06665622	6	46293571	76415	4	AP	RCAN2	-0.99486	2.21645e-07	1.03e-06	0.001		-0.117494	0.584536	0.747828	0.596
KIRC	cg06711837	X	137792814	90232	4	AP	FGF13	0.19678	0.0119494	0.022885	0.015		-0.165977	0.438275	0.638225	0.443
KIRC	cg06753281	1	6086652	361	3	AP	KCNAB2	-0.347977	3.90801e-06	1.45286e-05	0.001		-0.401285	0.0577192	0.164318	0.068
KIRC	cg07057320	21	37852479	60531	4	AP	CLDN14	0.232331	0.000473197	0.00124608	0.001		-0.0385757	0.861276	0.928885	0.876
KIRC	cg07101841	17	75315527	43723	6.1	AP	42987	-0.378086	0.00111259	0.00264345	0.002		-0.0947826	0.658537	0.783186	0.657
KIRC	cg07137934	5	180230911	75022	5	AP	MGAT1	-0.165868	0.00740491	0.0148098	0.008		-0.571429	0.00353587	0.0266032	0.003
KIRC	cg07148458	17	7254301	38919	22.1	AP	ACAP1	-0.675015	1.01369e-30	6.40651e-29	0.001		-0.0530435	0.805567	0.880828	0.794
KIRC	cg07164388	14	24779400	26961	1.2:1.3	RI	LTB4R2	0.314289	0.00077595	0.0019616	0.001		0.144037	0.544615	0.720077	0.534
KIRC	cg07320595	5	156485233	74310	2.1	AP	HAVCR1	-0.163716	1.10617e-06	4.66065e-06	0.001		-0.0338473	0.887346	0.93892	0.882
KIRC	cg07620230	20	62328084	60145	36	AT	RTEL1	-0.302149	1.94794e-06	7.59935e-06	0.001		0.391304	0.0596064	0.168175	0.073
KIRC	cg07744502	11	93271083	18300	2	AP	SMCO4	-0.445038	1.3351e-06	5.55122e-06	0.001		-0.561915	0.00426844	0.0293223	0.003
KIRC	cg07785552	1	26869620	1282	5	AP	RPS6KA1	-0.205036	0.0297639	0.0513957	0.034		-0.53913	0.00734878	0.0422221	0.004
KIRC	cg08160706	16	11876111	34034	2.1	AP	ZC3H7A	-0.34621	4.74063e-11	3.65376e-10	0.001		-0.141516	0.509508	0.691006	0.554
KIRC	cg08224785	5	156696189	74323	3	AP	CYFIP2	-0.0592948	4.12126e-06	1.49382e-05	0.001		-0.26	0.218947	0.395356	0.203
KIRC	cg08225986	22	31737754	61844	3	AT	PATZ1	-0.0898161	0.0236187	0.0424063	0.026		-0.451304	0.0280126	0.107914	0.029
KIRC	cg08309809	8	22960572	83065	4.3	AT	TNFRSF10C	0.463864	1.14656e-13	1.06562e-12	0.001		0.663188	0.000412128	0.00813998	<0.001
KIRC	cg08343644	16	57662060	36573	3.1	AP	GPR56	0.249917	0.00167073	0.00388199	0.004		0.648402	0.000610759	0.0101579	0.001
KIRC	cg08715226	20	62327732	60144	35.2	AT	RTEL1	0.547592	2.25449e-08	1.37004e-07	0.001		-0.214783	0.312017	0.503048	0.303
KIRC	cg08864105	1	111743020	4141	2	AP	DENND2D	-0.309906	6.21089e-08	3.38386e-07	0.001		0.251304	0.235178	0.415119	0.235
KIRC	cg09179916	5	38445834	71837	20.1	AP	EGFLAM	-0.464304	1.18405e-14	1.20696e-13	0.001		0.487372	0.0157076	0.0719363	0.015
KIRC	cg09325003	3	69812885	65585	3	AP	MITF	-0.184416	0.0279251	0.0487532	0.029		0.45426	0.0257528	0.103011	0.027
KIRC	cg09802688	1	209942066	9680	10	AP	TRAF3IP3	-0.122084	0.0475357	0.0794776	0.044		-0.398946	0.0906462	0.217002	0.08
KIRC	cg09853936	1	3388196	310	7	AP	ARHGEF16	-0.201184	0.0134119	0.0252272	0.012		-0.371405	0.0810021	0.198424	0.071
KIRC	cg10165801	17	46651186	42192	6.1	AP	HOXB3	0.180634	1.70729e-05	5.50512e-05	0.001		0.250489	0.237774	0.415119	0.232
KIRC	cg10305311	13	96204873	26114	2	AP	CLDN10	-0.232041	0.000301114	0.000825769	0.001		-0.88367	1.05245e-08	2.93642e-06	<0.001
KIRC	cg10431989	3	108021214	66019	2	AP	HHLA2	0.337018	0.00207628	0.00462045	0.004		0.743048	0.00150297	0.0158313	0.001
KIRC	cg10453071	16	57513414	36566	2.1	AP	DOK4	-0.206457	0.0126878	0.024008	0.019		-0.652174	0.000987969	0.0139435	<0.001
KIRC	cg10473369	17	7492352	39009	1.4	AT	SOX15	0.434984	5.82549e-05	0.000172043	0.001		0.37913	0.0685462	0.179013	0.079
KIRC	cg10494537	22	17700308	60973	2	AP	CECR1	-0.658417	4.08444e-06	1.49382e-05	0.001		-0.436653	0.0328943	0.12229	0.04
KIRC	cg10635122	19	52391090	51381	1.2:1.3	RI	ZNF577	0.351596	7.85945e-12	6.89885e-11	0.001		-0.0121739	0.956219	0.981055	0.968
KIRC	cg10783469	19	52391234	51380	1.3	RI	ZNF577	0.190527	3.64919e-05	0.000109823	0.001		0.117877	0.583301	0.747828	0.59
KIRC	cg10998884	11	10673997	14361	4.1	AP	MRVI1	-0.47391	8.77646e-16	1.02717e-14	0.001		-0.00197677	0.992858	0.99601	0.992
KIRC	cg11011913	3	149051159	67217	2.1	AP	TM4SF18	-0.392896	5.76302e-14	5.51853e-13	0.001		-0.318261	0.12969	0.273213	0.129
KIRC	cg11076954	17	1508444	38341	7	AP	SLC43A2	-0.394368	8.85047e-21	1.99768e-19	0.001		-0.450435	0.0283446	0.107914	0.017
KIRC	cg11269599	19	52391304	51381	1.2:1.3	RI	ZNF577	0.339962	5.54397e-07	2.39986e-06	0.001		0.117852	0.583383	0.747828	0.569
KIRC	cg11361895	2	261362	52495	6	AP	SH3YL1	0.175762	0.00600659	0.0123252	0.005		0.413043	0.0459382	0.142318	0.043
KIRC	cg11472279	10	11059733	10730	2	AP	CELF2	-0.318254	0.0004061	0.00108752	0.002		-0.221657	0.3215	0.513101	0.301
KIRC	cg11603443	3	58572520	65461	3	AP	FAM107A	-0.126801	0.000472846	0.00124608	0.002		0.398261	0.0549246	0.159231	0.054
KIRC	cg11628880	21	37852492	60531	4	AP	CLDN14	0.159657	0.015281	0.0284047	0.009		-0.0979229	0.656679	0.783186	0.666
KIRC	cg11761535	3	149051031	67217	2.1	AP	TM4SF18	-0.280182	1.81239e-06	7.15896e-06	0.001		-0.426087	0.0390179	0.132577	0.039
KIRC	cg11778840	21	40823722	60639	2	AP	SH3BGR	-0.66595	1.90673e-11	1.62845e-10	0.001		-0.59913	0.0024038	0.0217029	0.005
KIRC	cg12356890	10	11059727	10730	2	AP	CELF2	-0.269595	0.00137243	0.0032125	0.004		-0.246676	0.268429	0.448802	0.268
KIRC	cg12510724	12	6484607	19840	2	AP	SCNN1A	-0.190127	0.0305235	0.0524208	0.032		-0.479235	0.0178139	0.0781832	0.024
KIRC	cg13293524	17	46651822	42192	6.1	AP	HOXB3	0.184525	1.07126e-05	3.48988e-05	0.001		0.460535	0.023532	0.0978437	0.026
KIRC	cg13523819	3	69915449	65584	4	AP	MITF	-0.160055	0.000625064	0.0015929	0.002		-0.27251	0.197642	0.36311	0.194
KIRC	cg13944685	11	71710643	17481	1.7	RI	IL18BP	-0.364768	0.000599243	0.00153952	0.002		0.287826	0.172193	0.331787	0.141
KIRC	cg14015044	8	22960619	83065	4.3	AT	TNFRSF10C	0.47029	7.50092e-11	5.64355e-10	0.001		0.418443	0.0418536	0.136348	0.055
KIRC	cg14311559	12	7060257	20023	2	AP	PTPN6	-0.998483	1.91885e-26	6.73728e-25	0.001		-0.74364	3.12011e-05	0.00246489	<0.001
KIRC	cg14468692	11	504784	13674	3:4.2	ES	RNH1	0.122478	0.0221058	0.0401462	0.029		0.0713199	0.74052	0.841219	0.736
KIRC	cg14546619	12	58019647	22675	12	AT	B4GALNT1	-0.151395	0.00809129	0.0160808	0.008		-0.107003	0.618728	0.773118	0.611
KIRC	cg14677130	5	38445916	71837	20.1	AP	EGFLAM	-0.392287	2.61984e-15	2.85473e-14	0.001		0.426	0.0379279	0.130274	0.041
KIRC	cg14695663	8	145013478	85516	9	AP	PLEC	-0.446641	1.38618e-27	6.25761e-26	0.001		-0.5	0.0138593	0.0663565	0.012
KIRC	cg14864103	13	113622738	26320	6	AP	MCF2L	-0.182542	4.23972e-16	5.15289e-15	0.001		-0.200043	0.348649	0.545411	0.345
KIRC	cg15138846	8	18067560	82851	3	AP	NAT1	-0.261371	0.00169727	0.00388649	0.002		-0.494319	0.0140749	0.0663833	0.017
KIRC	cg15142477	18	43915662	45395	1.5	AT	RNF165	-0.193299	0.00465169	0.00979956	0.009		0.696522	0.000229414	0.00557652	0.001
KIRC	cg15412815	11	93271088	18300	2	AP	SMCO4	-0.291269	2.83381e-08	1.68959e-07	0.001		-0.540153	0.00643596	0.0398777	0.002
KIRC	cg15616257	21	40823680	60639	2	AP	SH3BGR	-0.603211	3.78712e-11	2.99182e-10	0.001		-0.56534	0.00399123	0.0280273	0.005
KIRC	cg15731317	11	85430070	18142	10.1	AP	SYTL2	-0.748783	1.72518e-14	1.70361e-13	0.001		-0.667826	0.000501799	0.00880937	<0.001
KIRC	cg16094145	12	719491	19604	3	AP	NINJ2	-0.362307	0.0196144	0.0358274	0.014		-0.35161	0.0920144	0.218621	0.079
KIRC	cg16232183	13	96204854	26114	2	AP	CLDN10	-0.309121	4.16e-06	1.49382e-05	0.001		-0.734508	4.3748e-05	0.00276487	<0.001
KIRC	cg16385335	11	71710614	17481	1.7	RI	IL18BP	-0.267117	0.010994	0.0211835	0.013		0.170435	0.424145	0.632418	0.426
KIRC	cg16473141	14	24641501	26881	1.2	RI	REC8	0.472045	3.89639e-05	0.000116156	0.001		0.135682	0.527288	0.703051	0.551
KIRC	cg16731240	19	52391250	51380	1.3	RI	ZNF577	0.194467	2.6354e-06	1.00336e-05	0.001		0.432703	0.0346947	0.126719	0.04
KIRC	cg16851482	4	6955953	68727	4	AP	TBC1D14	-0.0888999	0.00437172	0.00933421	0.005		-0.427484	0.0371921	0.129417	0.053
KIRC	cg17133446	22	26961427	61518	3	AP	TPST2	-0.40303	2.4978e-34	1.97326e-32	0.001		0.0730594	0.734411	0.840848	0.715
KIRC	cg17142149	6	46293016	76415	4	AP	RCAN2	-1.34114	1.44148e-50	4.55508e-48	0.001		-0.113142	0.59862	0.762027	0.614
KIRC	cg17143179	6	106546824	77111	4	AP	PRDM1	-0.183566	0.0524687	0.0868069	0.046		-0.448845	0.107424	0.243457	0.112
KIRC	cg17290701	10	11059714	10730	2	AP	CELF2	-0.43422	0.000123184	0.000350687	0.002		-0.335218	0.127246	0.271688	0.12
KIRC	cg17298275	17	934652	38287	20	AP	ABR	-0.181312	1.07193e-08	6.93253e-08	0.001		-0.567826	0.00441129	0.0293851	0.004
KIRC	cg17777592	13	49975418	25885	4.1	AP	CAB39L	-0.42858	1.13233e-14	1.19272e-13	0.001		-0.556522	0.00542026	0.0342561	0.004
KIRC	cg17888033	8	143858414	85364	2	AP	LYNX1	-0.428989	3.55662e-06	1.33797e-05	0.001		-0.326957	0.119103	0.263193	0.136
KIRC	cg18170989	13	49975383	25885	4.1	AP	CAB39L	-0.306491	1.28338e-10	9.43136e-10	0.001		-0.513913	0.0111445	0.0558995	0.007
KIRC	cg18224729	11	57559066	16000	4.1:4.2:4.3	ES	CTNND1	-0.181779	5.98518e-05	0.000175122	0.001		-0.102609	0.632132	0.777252	0.62
KIRC	cg18393747	13	96205295	26114	2	AP	CLDN10	-1.01988	1.42384e-36	1.49978e-34	0.001		-0.852794	1.20689e-07	1.27126e-05	<0.001
KIRC	cg18503031	3	69915406	65584	4	AP	MITF	-0.147131	0.00971099	0.0189424	0.008		-0.311807	0.138006	0.286907	0.152
KIRC	cg18512948	14	24641706	26881	1.2	RI	REC8	0.427445	3.37409e-05	0.00010252	0.001		0.153512	0.473889	0.67152	0.461
KIRC	cg18566313	4	186733428	71374	3	AP	SORBS2	-0.193439	0.0257599	0.0459893	0.025		-0.494783	0.0150093	0.069749	0.016
KIRC	cg18621299	14	100531591	29241	3	AP	EVL	-0.385934	4.54608e-07	2.02333e-06	0.001		-0.156522	0.463425	0.662635	0.467
KIRC	cg19222784	11	20044428	14692	17	AP	NAV2	-0.0496812	0.000821724	0.00206083	0.001		-0.290435	0.168206	0.329955	0.156
KIRC	cg19540316	13	113622750	26320	6	AP	MCF2L	-0.17883	1.90158e-16	2.6126e-15	0.001		-0.112174	0.600458	0.762027	0.601
KIRC	cg19735250	17	43318610	41953	13.1	AP	FMNL1	0.259304	0.000833929	0.00207497	0.002		-0.217511	0.49708	0.688177	0.493
KIRC	cg20358275	11	74870675	17819	2	AP	SLCO2B1	-0.172894	0.00453652	0.00962107	0.005		-0.615399	0.00137021	0.0153791	<0.001
KIRC	cg20597143	20	62327117	60144	35.2	AT	RTEL1	0.213113	0.000557275	0.00144343	0.001		0.104348	0.626323	0.773118	0.623
KIRC	cg20689294	10	129846082	13457	6	AP	PTPRE	-0.381179	1.87167e-05	5.97421e-05	0.001		-0.309994	0.160126	0.318237	0.174
KIRC	cg20949700	11	20044468	14692	17	AP	NAV2	-0.0401577	0.00296262	0.0065013	0.003		-0.171304	0.421753	0.632418	0.412
KIRC	cg21090298	13	113622686	26320	6	AP	MCF2L	-0.243356	4.23813e-18	7.87793e-17	0.001		-0.0700152	0.745112	0.841219	0.767
KIRC	cg21153181	X	153637497	90575	3.1	AP	DNASE1L1	-0.219988	1.56177e-06	6.40935e-06	0.001		-0.26	0.218947	0.395356	0.23
KIRC	cg21172319	8	18067770	82851	3	AP	NAT1	-0.324726	1.07498e-08	6.93253e-08	0.001		-0.515792	0.00988353	0.0527512	0.012
KIRC	cg21201393	5	38445522	71837	20.1	AP	EGFLAM	-0.564378	2.14101e-16	2.81899e-15	0.001		0.164263	0.443086	0.641074	0.468
KIRC	cg21631439	19	10736448	47559	2	AP	SLC44A2	-0.262982	2.61239e-05	8.17341e-05	0.001		-0.145249	0.498285	0.688177	0.493
KIRC	cg21663431	19	10736355	47559	2	AP	SLC44A2	-0.153338	0.00576156	0.0118997	0.005		-0.257012	0.225368	0.404637	0.218
KIRC	cg21806242	11	72532891	17666	4.1:4.2	AA	ATG16L2	0.301687	0.00169215	0.00388649	0.004		-0.0530435	0.805567	0.880828	0.811
KIRC	cg22053945	17	46651360	42192	6.1	AP	HOXB3	0.180019	0.000100075	0.000287488	0.002		0.367036	0.0776841	0.193293	0.071
KIRC	cg22123459	22	25003499	61431	3	AP	GGT1	-0.902293	6.4896e-08	3.47579e-07	0.001		-0.617628	0.00130109	0.0152276	0.001
KIRC	cg22257574	9	135754383	87992	2	AP	C9orf9	-0.502834	2.09314e-07	9.87211e-07	0.001		-0.641739	0.000950708	0.0139435	0.003
KIRC	cg22378252	6	10521452	75296	4	AP	GCNT2	-0.19731	4.29104e-08	2.4654e-07	0.001		-0.386957	0.0626877	0.17077	0.069
KIRC	cg23010048	19	52391257	51380	1.3	RI	ZNF577	0.213093	1.80774e-06	7.15896e-06	0.001		0.329274	0.116143	0.258458	0.122
KIRC	cg23029021	11	414951	13650	2	AP	SIGIRR	-0.228994	5.72024e-06	2.00844e-05	0.001		-0.276522	0.190248	0.357848	0.198
KIRC	cg23137531	13	113622708	26320	6	AP	MCF2L	-0.142506	2.60595e-11	2.16705e-10	0.001		-0.231304	0.275512	0.455821	0.264
KIRC	cg23229016	1	26872525	1281	7	AP	RPS6KA1	-0.712771	2.74778e-17	4.56999e-16	0.001		-0.386255	0.0622735	0.17077	0.062
KIRC	cg23324953	8	145013728	85516	9	AP	PLEC	-0.317204	4.56108e-06	1.61944e-05	0.001		-0.127826	0.550161	0.724379	0.564
KIRC	cg23363526	22	25003552	61431	3	AP	GGT1	-0.91088	4.85454e-08	2.73935e-07	0.001		-0.691906	0.00018006	0.00551115	<0.001
KIRC	cg23462242	5	156696185	74323	3	AP	CYFIP2	-0.0469447	2.49232e-05	7.87572e-05	0.001		-0.313913	0.135236	0.28301	0.128
KIRC	cg23965061	8	22960599	83065	4.3	AT	TNFRSF10C	0.506638	3.42473e-13	3.09205e-12	0.001		0.574038	0.0033546	0.0263735	0.003
KIRC	cg24020826	8	140630180	98064	2.2	AT	KCNK9	0.412432	0.00103801	0.0025039	0.002		-0.313527	0.145172	0.294065	0.131
KIRC	cg24391122	19	7986137	47195	2	AP	SNAPC2	-1.04162	1.38813e-08	8.77296e-08	0.001		-0.432174	0.0360882	0.129417	0.031
KIRC	cg24401557	X	137793853	90232	4	AP	FGF13	0.126999	0.0122355	0.0232917	0.015		-0.0327871	0.879117	0.938516	0.863
KIRC	cg24588162	13	113633484	26317	8	AP	MCF2L	-0.560482	1.07656e-06	4.59721e-06	0.001		-0.590435	0.0028617	0.0242389	<0.001
KIRC	cg24659328	3	58563666	65462	4	AP	FAM107A	-0.0885047	0.00708422	0.0143112	0.009		0.250489	0.237774	0.415119	0.24
KIRC	cg24767968	17	46651945	42192	6.1	AP	HOXB3	0.181498	6.09845e-06	2.07216e-05	0.001		0.395738	0.0555944	0.159708	0.052
KIRC	cg24794228	19	52391166	51380	1.3	RI	ZNF577	0.19276	2.83857e-07	1.29998e-06	0.001		0.558625	0.00454985	0.0293851	0.002
KIRC	cg24963001	17	46651952	42192	6.1	AP	HOXB3	0.141602	0.000521509	0.00136196	0.002		0.525332	0.00838596	0.0473208	0.006
KIRC	cg25032595	13	96204978	26114	2	AP	CLDN10	-0.984249	3.14277e-41	4.96557e-39	0.001		-0.877147	1.8585e-08	2.93642e-06	<0.001
KIRC	cg25690715	17	75315567	43723	6.1	AP	42987	-0.491504	0.000863544	0.00213187	0.007		0.0365217	0.865954	0.930753	0.859
KIRC	cg25817165	18	72167213	45816	2.2	AA	CNDP2	-0.0944554	1.23875e-07	6.21342e-07	0.001		-0.468696	0.022008	0.0939802	0.022
KIRC	cg25986727	11	71723428	17515	18	ES	NUMA1	0.202685	0.0019312	0.004359	0.005		0.0056534	0.979084	0.991636	0.98
KIRC	cg26328510	10	11059718	10730	2	AP	CELF2	-0.418917	8.72972e-06	2.90378e-05	0.002		-0.558258	0.00693137	0.040968	0.01
KIRC	cg26363363	12	7060386	20023	2	AP	PTPN6	-0.763914	1.13421e-22	2.75701e-21	0.001		-0.424348	0.0398891	0.132684	0.04
KIRC	cg26486070	22	25003675	61431	3	AP	GGT1	-0.812307	9.35925e-17	1.35703e-15	0.001		-0.659704	0.000453003	0.00842052	<0.001
KIRC	cg26781466	6	10521612	75296	4	AP	GCNT2	-0.14132	1.64409e-06	6.66067e-06	0.001		-0.523478	0.00954791	0.0527512	0.005
KIRC	cg26842802	2	202125212	56814	4	AP	CASP8	-0.232389	9.44764e-17	1.35703e-15	0.001		-0.472287	0.0197889	0.0856617	0.015
KIRC	cg26842815	12	7060263	20023	2	AP	PTPN6	-0.793414	4.98551e-25	1.4322e-23	0.001		-0.702609	0.000191844	0.00551115	<0.001
KIRC	cg27041794	10	11059708	10730	2	AP	CELF2	-0.657691	2.06837e-07	9.87211e-07	0.001		-0.467496	0.0282466	0.107914	0.025
KIRC	cg27178401	16	10652711	33987	2	AP	EMP2	-0.568458	9.83531e-27	3.88495e-25	0.001		-0.109565	0.609029	0.769813	0.615
KIRC	cg27200006	22	25003854	61431	3	AP	GGT1	-0.496454	5.89554e-06	2.02499e-05	0.001		-0.663186	0.000412151	0.00813998	0.001
KIRC	cg27445278	22	26961465	61518	3	AP	TPST2	-0.35724	1.40137e-28	7.38054e-27	0.001		0.168696	0.428951	0.633404	0.433
KIRC	cg27534599	22	17680477	60971	6	AP	CECR1	-0.875792	1.57707e-17	2.76863e-16	0.001		-0.573056	0.00342188	0.0263735	0.003
KIRC	cg26084439	7	99160261	80698	5.3	ES	ZNF655	-0.208168	0.0356735	0.0609341	0.04		-0.272668	0.197372	0.36311	0.199
KIRC	cg06291428	11	57559063	15980	4.1:4.2:4.3:5	ES	CTNND1	-0.192408	1.98129e-06	7.63521e-06	0.001		-0.320574	0.126691	0.271688	0.127
KIRC	cg06291428	11	57559063	15942	3:4.1:4.2:4.3	ES	CTNND1	-0.178222	0.00523208	0.0108772	0.009		-0.422407	0.0397563	0.132684	0.045
KIRC	cg06291428	11	57559063	15990	3:4.1:4.2:4.3	ES	CTNND1	-0.114408	0.019568	0.0358274	0.018		-0.644142	0.00291481	0.0242389	0.004
KIRC	cg06291428	11	57559063	15999	3:4.1:4.2:4.3	ES	CTNND1	-0.100879	0.00619207	0.0126238	0.002		-0.515007	0.010016	0.0527512	0.008
KIRC	cg06291428	11	57559063	16002	3:4.2:4.3	ES	CTNND1	-0.0801025	0.0278175	0.0487532	0.024		-0.609528	0.00156753	0.0159787	0.003
KIRC	cg18224729	11	57559066	15980	4.1:4.2:4.3:5	ES	CTNND1	-0.224999	5.80845e-06	2.017e-05	0.001		-0.154783	0.468467	0.666827	0.48
KIRC	cg18224729	11	57559066	15942	3:4.1:4.2:4.3	ES	CTNND1	-0.225572	0.00403738	0.00873843	0.005		-0.686276	0.000213321	0.00557652	<0.001
KIRC	cg18224729	11	57559066	15990	3:4.1:4.2:4.3	ES	CTNND1	-0.146659	0.0142892	0.0267183	0.017		-0.654386	0.00301662	0.0244424	0.003
KIRC	cg18224729	11	57559066	15999	3:4.1:4.2:4.3	ES	CTNND1	-0.127374	0.00482779	0.0101032	0.002		-0.518261	0.0103932	0.0538403	0.007
KIRC	cg18224729	11	57559066	16002	3:4.2:4.3	ES	CTNND1	-0.0897354	0.045432	0.0763644	0.046		-0.386171	0.0623353	0.17077	0.076
KIRC	cg03562414	19	52391078	51380	1.3	RI	ZNF577	0.182048	5.87576e-08	3.25744e-07	0.001		0.628099	0.00101488	0.0139435	<0.001
KIRC	cg10635122	19	52391090	51380	1.3	RI	ZNF577	0.201089	1.75636e-07	8.67203e-07	0.001		0.241357	0.255882	0.437074	0.257
KIRC	cg10783469	19	52391234	51381	1.2:1.3	RI	ZNF577	0.322455	2.05235e-07	9.87211e-07	0.001		0.196999	0.356183	0.551735	0.352
KIRC	cg16731240	19	52391250	51381	1.2:1.3	RI	ZNF577	0.319401	9.48468e-09	6.51556e-08	0.001		0.158261	0.458413	0.658447	0.429
KIRC	cg23010048	19	52391257	51381	1.2:1.3	RI	ZNF577	0.351512	4.58395e-09	3.29211e-08	0.001		-0.0308763	0.886116	0.93892	0.896
KIRC	cg24794228	19	52391166	51381	1.2:1.3	RI	ZNF577	0.285186	1.85096e-08	1.14687e-07	0.001		0.338408	0.105773	0.242205	0.113
KIRP	cg00005112	16	69958840	37313	15.1	AP	WWP2	-0.148579	0.000105708	0.00021369	0.001		-0.217391	0.317522	0.556639	0.305
KIRP	cg01204982	11	74870741	17819	2	AP	SLCO2B1	-0.460023	1.12872e-08	3.5966e-08	0.001		-0.562886	0.00516881	0.0502113	0.002
KIRP	cg01407244	8	22961007	83065	4.3	AT	TNFRSF10C	0.252885	3.56957e-05	7.71356e-05	0.001		-0.114625	0.60123	0.77561	0.6
KIRP	cg01444716	20	11898557	58697	2.2	RI	BTBD3	-0.127649	0.00301492	0.00501598	0.001		0.121542	0.579256	0.77561	0.558
KIRP	cg02044895	11	58343318	16010	2	AP	LPXN	-0.276316	2.44925e-13	1.18067e-12	0.001		-0.800395	6.3508e-06	0.000156057	<0.001
KIRP	cg02245810	22	51017432	62867	4	AP	CPT1B	-0.330026	1.30781e-18	9.83476e-18	0.001		-0.334839	0.127928	0.322189	0.146
KIRP	cg02644867	19	1271057	46437	8.2:8.3	AA	CIRBP	0.124247	0.0250247	0.0379406	0.022		-0.215133	0.334717	0.562803	0.325
KIRP	cg02938601	8	22961088	83065	4.3	AT	TNFRSF10C	0.189181	0.00169007	0.00286245	0.001		0.055336	0.802065	0.897549	0.791
KIRP	cg03023900	17	62085236	43038	3.1	AP	ICAM2	-0.276445	1.676e-06	4.03959e-06	0.001		-0.465415	0.0264533	0.111026	0.022
KIRP	cg03172947	20	44035850	59534	2	AP	DBNDD2	-0.103636	0.000722809	0.00130662	0.002		-0.31233	0.146797	0.349339	0.142
KIRP	cg03562414	19	52391078	51381	1.2:1.3	RI	ZNF577	0.245414	3.45676e-08	1.03154e-07	0.001		0.275334	0.203527	0.425146	0.224
KIRP	cg03733831	X	17653562	88586	1	AP	NHS	0.147179	4.10918e-05	8.77869e-05	0.001		0.521739	0.0116826	0.0686352	0.011
KIRP	cg03815552	16	617420	32900	3	AP	PIGQ	0.633972	1.37365e-21	1.35919e-20	0.001		0.216403	0.319772	0.556639	0.316
KIRP	cg04187185	5	43396953	71944	1	AP	CCL28	0.498939	1.04484e-12	4.79098e-12	0.001		-0.142044	0.517943	0.731642	0.542
KIRP	cg04332526	16	3707039	33608	9.2	RI	DNASE1	0.464157	0.00132646	0.00226836	0.006		0.449605	0.0326003	0.130401	0.025
KIRP	cg04603730	13	96204870	26114	2	AP	CLDN10	-0.453537	1.03403e-15	6.12924e-15	0.001		-0.317194	0.140274	0.338096	0.144
KIRP	cg04682802	20	11898478	58697	2.2	RI	BTBD3	-0.132344	0.00187854	0.00315326	0.004		-0.108696	0.620344	0.782716	0.617
KIRP	cg04874031	7	134464411	81856	2	AP	CALD1	0.271161	0.00914109	0.0149437	0.012		0.11166	0.610756	0.779876	0.626
KIRP	cg05047095	16	30428842	36105	4	AT	ZNF771	0.115917	0.0168829	0.0262313	0.027		0.0770751	0.72617	0.858616	0.749
KIRP	cg05822633	20	11898531	58697	2.2	RI	BTBD3	-0.146212	0.00132723	0.00226836	0.004		0.0108696	0.962194	0.983112	0.971
KIRP	cg06045319	10	79395902	12279	2.2	AT	KCNMA1	0.0950485	0.0253712	0.0381583	0.025		-0.120553	0.582373	0.77561	0.598
KIRP	cg06400204	11	71902997	17582	3.1	AP	FOLR1	-0.522509	3.29545e-24	8.85063e-23	0.001		-0.164566	0.453039	0.679703	0.486
KIRP	cg06428163	13	96204856	26114	2	AP	CLDN10	-0.570953	2.9237e-22	3.66437e-21	0.001		-0.495059	0.0174641	0.0887365	0.008
KIRP	cg06812840	17	7492524	39009	1.4	AT	SOX15	0.517174	3.32584e-10	1.20242e-09	0.001		0.140316	0.521489	0.731642	0.533
KIRP	cg07195469	X	153637739	90575	3.1	AP	DNASE1L1	-0.41769	1.37392e-14	7.17491e-14	0.001		-0.587945	0.00376175	0.0416006	0.004
KIRP	cg07215695	2	85637834	54272	2	AP	CAPG	0.485326	1.66462e-16	1.11767e-15	0.001		-0.545455	0.00797191	0.053403	0.008
KIRP	cg07405121	16	2083168	33186	3	AP	SLC9A3R2	-0.39311	2.3394e-06	5.3635e-06	0.001		-0.395257	0.0629475	0.185957	0.049
KIRP	cg07735851	16	3707175	33608	9.2	RI	DNASE1	0.697637	9.39044e-08	2.67485e-07	0.001		0.565217	0.00568528	0.0502113	0.003
KIRP	cg08225986	22	31737754	61844	3	AT	PATZ1	-0.217761	4.16549e-11	1.63148e-10	0.001		-0.384977	0.0696824	0.198489	0.054
KIRP	cg08309809	8	22960572	83065	4.3	AT	TNFRSF10C	0.54472	8.68143e-25	2.72018e-23	0.001		0.0652174	0.767302	0.876933	0.773
KIRP	cg08601673	16	2083393	33186	3	AP	SLC9A3R2	-0.278591	9.27524e-05	0.000189537	0.001		0.160079	0.463886	0.681333	0.462
KIRP	cg08864105	1	111743020	4141	2	AP	DENND2D	-0.55564	1.51403e-22	2.18952e-21	0.001		-0.469368	0.0250738	0.111026	0.025
KIRP	cg09080444	11	71903227	17582	3.1	AP	FOLR1	-0.312107	9.7357e-12	4.25654e-11	0.001		-0.496664	0.0159184	0.0855044	0.017
KIRP	cg09419444	16	69958792	37313	15.1	AP	WWP2	-0.122256	0.000139742	0.000279485	0.001		-0.0943909	0.668362	0.80645	0.667
KIRP	cg09701582	2	177017797	56116	1	AP	HOXD3	0.388169	1.49932e-08	4.62084e-08	0.001		-0.148221	0.498038	0.714742	0.502
KIRP	cg10163050	X	153637650	90575	3.1	AP	DNASE1L1	-0.339452	1.22325e-08	3.83284e-08	0.001		-0.512846	0.0134001	0.0748438	0.011
KIRP	cg10208654	X	135230613	90187	3.1	AP	FHL1	0.138107	0.00101092	0.00179296	0.002		0.256917	0.235635	0.474217	0.243
KIRP	cg10305311	13	96204873	26114	2	AP	CLDN10	-0.283304	1.9067e-09	6.40106e-09	0.001		-0.284585	0.187578	0.405341	0.186
KIRP	cg10473369	17	7492352	39009	1.4	AT	SOX15	0.732801	2.2485e-08	6.81804e-08	0.001		-0.101779	0.642954	0.790035	0.647
KIRP	cg10635122	19	52391090	51381	1.2:1.3	RI	ZNF577	0.256485	2.27336e-07	6.0196e-07	0.001		0.114681	0.602335	0.77561	0.582
KIRP	cg10783469	19	52391234	51380	1.3	RI	ZNF577	0.0953116	0.00110736	0.00194564	0.003		0.36656	0.0853609	0.232377	0.096
KIRP	cg11011913	3	149051159	67217	2.1	AP	TM4SF18	-0.538674	5.28858e-28	1.98851e-26	0.001		-0.0464542	0.833297	0.916139	0.853
KIRP	cg11269599	19	52391304	51381	1.2:1.3	RI	ZNF577	0.205832	0.000241754	0.000468555	0.002		0.417202	0.0476324	0.165831	0.043
KIRP	cg11778840	21	40823722	60637	2	AP	SH3BGR	0.68043	8.26194e-22	8.62914e-21	0.001		0.678854	0.000516008	0.00970095	0.001
KIRP	cg12057563	X	135230841	90187	3.1	AP	FHL1	0.146059	4.25947e-05	8.99753e-05	0.001		0.493083	0.0179722	0.0889152	0.017
KIRP	cg14015044	8	22960619	83065	4.3	AT	TNFRSF10C	0.434138	3.78825e-10	1.34376e-09	0.001		0.0938735	0.669182	0.80645	0.679
KIRP	cg14295696	X	135230717	90187	3.1	AP	FHL1	0.147712	0.000508715	0.000937632	0.002		0.104743	0.633224	0.788385	0.619
KIRP	cg14311559	12	7060257	20023	2	AP	PTPN6	-0.933476	6.00427e-23	1.02638e-21	0.001		-0.816206	2.91063e-06	0.00010944	<0.001
KIRP	cg14818960	11	71903119	17582	3.1	AP	FOLR1	-0.280655	4.32906e-09	1.42783e-08	0.001		0.177866	0.415067	0.639611	0.437
KIRP	cg15616257	21	40823680	60637	2	AP	SH3BGR	0.602673	3.61499e-22	3.99775e-21	0.001		0.682806	0.000465891	0.00970095	<0.001
KIRP	cg15677957	18	47088780	45486	1	AP	LIPG	0.45323	6.28951e-07	1.59788e-06	0.001		0.103286	0.639085	0.790035	0.649
KIRP	cg16232183	13	96204854	26114	2	AP	CLDN10	-0.442122	1.34494e-15	7.22425e-15	0.001		-0.463439	0.0271659	0.111026	0.029
KIRP	cg16253634	7	134464123	81856	2	AP	CALD1	0.27444	0.0140541	0.0222031	0.009		-0.0167984	0.940622	0.982427	0.924
KIRP	cg16275739	13	96204860	26114	2	AP	CLDN10	-0.362339	1.29604e-11	5.41459e-11	0.001		-0.222332	0.306425	0.54347	0.329
KIRP	cg16285854	11	85469247	18142	10.1	AP	SYTL2	0.534074	2.41547e-06	5.47119e-06	0.001		-0.0657277	0.765732	0.876933	0.776
KIRP	cg16324633	5	43397167	71944	1	AP	CCL28	1.13191	8.27255e-19	6.48017e-18	0.001		-0.0478463	0.828372	0.916082	0.832
KIRP	cg16556145	13	96205184	26114	2	AP	CLDN10	-0.732213	4.08397e-29	1.91947e-27	0.001		-0.3083	0.152211	0.35328	0.151
KIRP	cg16613938	19	1473042	46503	2.4	AT	C19orf25	-0.0624518	0.0227692	0.035087	0.019		0.0385375	0.861989	0.921989	0.856
KIRP	cg16731240	19	52391250	51380	1.3	RI	ZNF577	0.0947694	0.000272356	0.000522478	0.001		0.438783	0.036211	0.136153	0.027
KIRP	cg17777592	13	49975418	25885	4.1	AP	CAB39L	-0.457886	1.0301e-20	9.22182e-20	0.001		-0.379447	0.0750007	0.21045	0.079
KIRP	cg18170989	13	49975383	25885	4.1	AP	CAB39L	-0.423593	2.50123e-21	2.35115e-20	0.001		-0.393281	0.0643657	0.186166	0.059
KIRP	cg18808904	20	11898851	58697	2.2	RI	BTBD3	-0.228188	0.000355702	0.00066872	0.001		-0.350791	0.101281	0.264455	0.091
KIRP	cg19627006	2	85637673	54272	2	AP	CAPG	0.413399	1.07583e-15	6.12924e-15	0.001		-0.643281	0.00120984	0.0174961	0.002
KIRP	cg19638435	7	28452093	79076	2	AP	CREB5	-0.28767	4.59302e-07	1.19929e-06	0.001		-0.0443756	0.862851	0.921989	0.882
KIRP	cg19697239	12	752646	19605	2	AP	NINJ2	-0.0818527	0.012271	0.0195503	0.016		-0.0108776	0.960713	0.983112	0.969
KIRP	cg20329959	X	153637607	90575	3.1	AP	DNASE1L1	-0.270002	2.59074e-10	9.59703e-10	0.001		-0.59585	0.00323698	0.0380346	0.001
KIRP	cg20358275	11	74870675	17819	2	AP	SLCO2B1	-0.471391	2.20035e-13	1.08874e-12	0.001		-0.549543	0.00660275	0.0516903	0.002
KIRP	cg20999651	X	135230594	90187	3.1	AP	FHL1	0.158718	0.000581387	0.00106117	0.003		0.20751	0.340455	0.566421	0.36
KIRP	cg21153181	X	153637497	90575	3.1	AP	DNASE1L1	-0.24034	1.15139e-10	4.41758e-10	0.001		-0.543478	0.0082377	0.053403	0.013
KIRP	cg21459545	X	153637814	90575	3.1	AP	DNASE1L1	-0.178062	8.8185e-07	2.18142e-06	0.001		-0.393378	0.0633045	0.185957	0.064
KIRP	cg22234962	1	155291297	8078	3.1	AP	RUSC1	0.314998	2.35746e-11	9.42983e-11	0.001		-0.168972	0.439108	0.665744	0.452
KIRP	cg22257574	9	135754383	87992	2	AP	C9orf9	-0.338813	1.49716e-07	4.13921e-07	0.001		-0.545095	0.00714866	0.0516903	0.007
KIRP	cg22562219	X	153637700	90575	3.1	AP	DNASE1L1	-0.524628	5.97557e-16	3.87382e-15	0.001		-0.299407	0.164862	0.377977	0.168
KIRP	cg23010048	19	52391257	51380	1.3	RI	ZNF577	0.108646	0.000172162	0.00033715	0.003		0.604007	0.00227244	0.0284813	0.002
KIRP	cg23291200	19	1473179	46503	2.4	AT	C19orf25	-0.153616	0.00124873	0.00217371	0.005		-0.0237154	0.915508	0.961539	0.923
KIRP	cg23387422	X	153637603	90575	3.1	AP	DNASE1L1	-0.231563	1.73851e-07	4.66914e-07	0.001		-0.527668	0.0106423	0.0645403	0.008
KIRP	cg23965061	8	22960599	83065	4.3	AT	TNFRSF10C	0.556477	5.11823e-17	3.70088e-16	0.001		0.158103	0.469491	0.68422	0.458
KIRP	cg24292016	12	121087689	24775	3.1	AP	CABP1	-0.478773	3.61475e-12	1.61803e-11	0.001		-0.124506	0.569949	0.77561	0.535
KIRP	cg24324354	12	58004248	22665	3	AP	ARHGEF25	0.090193	0.00564489	0.00930911	0.003		0.231777	0.287261	0.52432	0.274
KIRP	cg24794228	19	52391166	51380	1.3	RI	ZNF577	0.077657	0.000504205	0.000937632	0.003		0.647699	0.000833399	0.0142436	0.001
KIRP	cg24834461	X	153637645	90575	3.1	AP	DNASE1L1	-0.260143	8.71272e-08	2.51999e-07	0.001		-0.416996	0.0489018	0.167155	0.057
KIRP	cg24956866	7	134464129	81856	2	AP	CALD1	0.246909	0.0264805	0.0391994	0.03		0.110672	0.613945	0.779876	0.604
KIRP	cg25032595	13	96204978	26114	2	AP	CLDN10	-0.739018	2.33511e-33	2.19501e-31	0.001		-0.278656	0.197248	0.416659	0.179
KIRP	cg25445853	X	135230696	90187	3.1	AP	FHL1	0.19278	4.76294e-05	9.83993e-05	0.001		0.294045	0.173235	0.387717	0.187
KIRP	cg25969992	12	121088408	24775	3.1	AP	CABP1	-0.347925	5.21635e-07	1.34339e-06	0.001		-0.228261	0.293432	0.530435	0.295
KIRP	cg26476820	2	85637851	54272	2	AP	CAPG	0.477307	9.27721e-20	7.58416e-19	0.001		-0.426877	0.0433986	0.156903	0.039
KIRP	cg26842815	12	7060263	20023	2	AP	PTPN6	-0.806964	1.86783e-23	3.90255e-22	0.001		-0.828063	1.92097e-06	0.00010944	<0.001
KIRP	cg26876647	1	155291345	8078	3.1	AP	RUSC1	0.436623	6.02454e-10	2.09743e-09	0.001		-0.405138	0.0562179	0.176149	0.042
KIRP	cg27122706	12	31149418	20954	9	AT	TSPAN11	-0.111455	0.0243728	0.0372528	0.022		-0.245087	0.259681	0.503299	0.279
KIRP	cg27139457	2	85637739	54272	2	AP	CAPG	0.294005	2.2888e-06	5.31244e-06	0.001		-0.475296	0.0231146	0.108639	0.022
KIRP	cg27448433	7	28452066	79076	2	AP	CREB5	-0.277723	4.10299e-08	1.20525e-07	0.001		0.0361384	0.886795	0.941907	0.889
KIRP	cg08864105	1	111743020	4142	2	AP	DENND2D	0.555944	1.32172e-22	2.0707e-21	0.001		0.469368	0.0250738	0.111026	0.026
KIRP	cg22234962	1	155291297	8077	3.1	AP	RUSC1	-0.315047	2.12536e-11	8.68624e-11	0.001		0.168972	0.439108	0.665744	0.44
KIRP	cg26876647	1	155291345	8077	3.1	AP	RUSC1	-0.443656	2.60345e-10	9.59703e-10	0.001		0.405138	0.0562179	0.176149	0.058
KIRP	cg07215695	2	85637834	54271	2	AP	CAPG	-0.485326	1.66457e-16	1.11767e-15	0.001		0.545455	0.00797191	0.053403	0.008
KIRP	cg19627006	2	85637673	54271	2	AP	CAPG	-0.413398	1.07588e-15	6.12924e-15	0.001		0.643281	0.00120984	0.0174961	0.001
KIRP	cg26476820	2	85637851	54271	2	AP	CAPG	-0.477306	9.27849e-20	7.58416e-19	0.001		0.426877	0.0433986	0.156903	0.037
KIRP	cg27139457	2	85637739	54271	2	AP	CAPG	-0.294005	2.28887e-06	5.31244e-06	0.001		0.475296	0.0231146	0.108639	0.024
KIRP	cg04874031	7	134464411	81858	5	AP	CALD1	-0.269945	0.00947445	0.0153551	0.008		-0.116601	0.594916	0.77561	0.607
KIRP	cg16253634	7	134464123	81858	5	AP	CALD1	-0.273456	0.014423	0.0225961	0.017		0.006917	0.976591	0.985603	0.969
KIRP	cg24956866	7	134464129	81858	5	AP	CALD1	-0.245626	0.0273087	0.0401096	0.028		-0.115613	0.598069	0.77561	0.609
KIRP	cg22257574	9	135754383	87993	2	AP	C9orf9	0.338568	1.63176e-07	4.44595e-07	0.001		0.545095	0.00714866	0.0516903	0.013
KIRP	cg01204982	11	74870741	17818	1	AP	SLCO2B1	0.460024	1.12871e-08	3.5966e-08	0.001		0.562886	0.00516881	0.0502113	0.001
KIRP	cg02044895	11	58343318	16009	1.1	AP	LPXN	0.2764	2.6712e-13	1.25546e-12	0.001		0.800395	6.3508e-06	0.000156057	<0.001
KIRP	cg16285854	11	85469247	18144	1	AP	SYTL2	-0.403293	2.3001e-05	5.08313e-05	0.002		0.248085	0.253712	0.496852	0.249
KIRP	cg20358275	11	74870675	17818	1	AP	SLCO2B1	0.471391	2.20065e-13	1.08874e-12	0.001		0.549543	0.00660275	0.0516903	0.006
KIRP	cg14311559	12	7060257	20022	1	AP	PTPN6	0.933475	6.00544e-23	1.02638e-21	0.001		0.816206	2.91063e-06	0.00010944	<0.001
KIRP	cg19697239	12	752646	19604	3	AP	NINJ2	0.0686742	0.0262766	0.0391994	0.019		-0.0442535	0.841094	0.919335	0.845
KIRP	cg26842815	12	7060263	20022	1	AP	PTPN6	0.806963	1.86824e-23	3.90255e-22	0.001		0.828063	1.92097e-06	0.00010944	<0.001
KIRP	cg04603730	13	96204870	26116	1	AP	CLDN10	0.453537	1.03403e-15	6.12924e-15	0.001		0.317194	0.140274	0.338096	0.128
KIRP	cg06428163	13	96204856	26116	1	AP	CLDN10	0.570953	2.9237e-22	3.66437e-21	0.001		0.495059	0.0174641	0.0887365	0.023
KIRP	cg10305311	13	96204873	26116	1	AP	CLDN10	0.283304	1.9067e-09	6.40106e-09	0.001		0.284585	0.187578	0.405341	0.202
KIRP	cg16232183	13	96204854	26116	1	AP	CLDN10	0.442122	1.34494e-15	7.22425e-15	0.001		0.463439	0.0271659	0.111026	0.014
KIRP	cg16275739	13	96204860	26116	1	AP	CLDN10	0.362339	1.29604e-11	5.41459e-11	0.001		0.222332	0.306425	0.54347	0.291
KIRP	cg16556145	13	96205184	26116	1	AP	CLDN10	0.732213	4.08397e-29	1.91947e-27	0.001		0.3083	0.152211	0.35328	0.163
KIRP	cg25032595	13	96204978	26116	1	AP	CLDN10	0.739018	2.33511e-33	2.19501e-31	0.001		0.278656	0.197248	0.416659	0.194
KIRP	cg03815552	16	617420	32898	1	AP	PIGQ	-0.627923	3.53617e-22	3.99775e-21	0.001		-0.163043	0.455546	0.679703	0.456
KIRP	cg03023900	17	62085236	43039	1.1	AP	ICAM2	0.276449	1.67534e-06	4.03959e-06	0.001		0.465415	0.0264533	0.111026	0.034
KIRP	cg03562414	19	52391078	51380	1.3	RI	ZNF577	0.0770865	0.000297243	0.000564462	0.001		0.522385	0.0105539	0.0645403	0.008
KIRP	cg10635122	19	52391090	51380	1.3	RI	ZNF577	0.0790685	0.000849321	0.00152069	0.004		0.410092	0.0519534	0.174415	0.05
KIRP	cg10783469	19	52391234	51381	1.2:1.3	RI	ZNF577	0.233183	0.000161128	0.000318864	0.001		0.115175	0.600761	0.77561	0.625
KIRP	cg16731240	19	52391250	51381	1.2:1.3	RI	ZNF577	0.224131	4.70706e-05	9.83252e-05	0.001		0.187346	0.392004	0.617182	0.4
KIRP	cg23010048	19	52391257	51381	1.2:1.3	RI	ZNF577	0.258743	2.32526e-05	5.08313e-05	0.001		0.365299	0.0865233	0.232377	0.088
KIRP	cg24794228	19	52391166	51381	1.2:1.3	RI	ZNF577	0.222021	2.22141e-06	5.2864e-06	0.001		0.439061	0.0360799	0.136153	0.037
KIRP	cg03172947	20	44035850	59536	1.1	AP	DBNDD2	0.142602	0.0097404	0.0156512	0.011		0.422925	0.0455375	0.161529	0.05
KIRP	cg02245810	22	51017432	62869	1	AP	CPT1B	0.262096	3.16357e-06	7.08038e-06	0.002		0.369848	0.0909711	0.240881	0.083
LIHC	cg02094018	17	17485934	39487	2	AP	PEMT	-0.869145	4.38719e-62	1.00905e-60	0.001		-0.124831	0.436781	0.502299	0.394
LIHC	cg19698668	7	148982080	82183	7	AT	ZNF783	-0.401217	4.39147e-23	3.36679e-22	0.001		-0.334321	0.0331805	0.127192	0.03
LIHC	cg20749741	2	264178	52493	3	AP	SH3YL1	-0.454543	1.45906e-24	1.67792e-23	0.001		-0.386939	0.0136424	0.107433	0.012
LIHC	cg00108164	2	264199	52493	3	AP	SH3YL1	-0.437459	1.04418e-22	6.00402e-22	0.001		-0.367986	0.0194813	0.112017	0.02
LIHC	cg00958884	17	74533976	43591	2	AP	CYGB	-0.370959	7.024e-15	2.30788e-14	0.001		-0.205253	0.197963	0.350243	0.212
LIHC	cg21825027	2	264166	52493	3	AP	SH3YL1	-0.509627	6.97273e-18	3.20746e-17	0.001		-0.38874	0.0131745	0.107433	0.019
LIHC	cg03468349	2	264164	52493	3	AP	SH3YL1	-0.402412	1.11013e-16	4.2555e-16	0.001		-0.38555	0.0140129	0.107433	0.016
LIHC	cg03140412	11	415111	13650	2	AP	SIGIRR	-0.337221	4.10149e-11	1.04816e-10	0.001		-0.220023	0.172503	0.350243	0.167
LIHC	cg04425701	19	35630474	49055	3	AP	FXYD1	-0.300367	1.17052e-10	2.69219e-10	0.001		-0.147045	0.358918	0.485595	0.354
LIHC	cg02585906	11	415088	13650	2	AP	SIGIRR	-0.383219	1.97264e-11	5.67134e-11	0.001		-0.272446	0.0889802	0.22655	0.09
LIHC	cg04029159	11	415080	13650	2	AP	SIGIRR	-0.362057	1.05189e-09	2.19941e-09	0.001		-0.26494	0.0985	0.22655	0.105
LIHC	cg17630392	5	32712623	71661	2	AP	NPR3	-0.259507	0.00105847	0.00187268	0.001		-0.168934	0.297381	0.455984	0.285
LIHC	cg23882796	17	77037938	43983	5	AP	C1QTNF1	-0.216651	2.0807e-05	3.98802e-05	0.001		-0.155636	0.331212	0.476117	0.323
LIHC	cg26852286	19	46032770	50488	4	AT	OPA3	0.0608894	0.0231153	0.0379751	0.018		0.132764	0.407961	0.502299	0.416
LUAD	cg06360465	3	50341183	64992	4.1	AP	HYAL1	-0.928951	4.4825e-30	1.16545e-28	0.001		0.0194805	0.934798	0.949809	0.931
LUAD	cg04767756	16	10652706	33987	2	AP	EMP2	-0.223099	3.24639e-10	1.68812e-09	0.001		-0.0181996	0.937589	0.949809	0.941
LUAD	cg00121389	8	17555302	82815	10	AP	MTUS1	-0.481069	2.43714e-13	1.58414e-12	0.001		-0.0480519	0.836787	0.949809	0.835
LUAD	cg05251269	16	2083128	33186	3	AP	SLC9A3R2	-0.635429	6.21984e-17	8.08579e-16	0.001		0.0753247	0.745389	0.949809	0.761
LUAD	cg22601415	10	61900940	11845	28	AP	ANK3	-0.678645	1.41675e-14	1.22785e-13	0.001		-0.148872	0.529556	0.949809	0.535
LUAD	cg04821942	13	99629970	26172	3	AP	DOCK9	-0.432264	2.90448e-09	1.25861e-08	0.001		0.135065	0.557984	0.949809	0.541
LUAD	cg26149678	11	71709917	17496	1.2:1.3:1.4:1.5:1.6:1.7	RI	IL18BP	0.593253	1.88981e-08	7.0193e-08	0.001		0.0721805	0.762467	0.949809	0.758
LUAD	cg16895486	8	26614263	83140	7.2	AT	ADRA1A	0.128261	4.12439e-06	1.09663e-05	0.001		0.149351	0.516607	0.949809	0.512
LUAD	cg12441126	7	751962	78509	5	AP	PRKAR1B	-0.105603	3.72115e-07	1.20937e-06	0.001		-0.333333	0.176416	0.949809	0.173
LUAD	cg26149678	11	71709917	17503	1.2:1.3:1.4:1.5:1.6	AD	IL18BP	0.426894	4.2178e-06	1.09663e-05	0.001		-0.0195489	0.936659	0.949809	0.94
LUAD	cg14184780	9	95475751	86883	7.2	RI	BICD2	0.380856	0.000354264	0.000767571	0.001		0.157143	0.494688	0.949809	0.493
LUAD	cg18184218	10	24755438	10994	10	AP	KIAA1217	-0.256464	0.00243564	0.00487128	0.004		-0.42987	0.0530967	0.949809	0.053
LUAD	cg08036668	15	49462157	30518	3.1	AP	GALK2	-0.248559	0.000147443	0.000348501	0.001		0.123377	0.592926	0.949809	0.588
LUAD	cg05191879	8	144650730	85424	9.1	AP	MROH6	-0.0717253	0.00926187	0.017008	0.016		0.0150433	0.949809	0.949809	0.954
LUAD	cg15576517	19	7711153	47123	17.1	AP	STXBP2	-0.25416	0.0098123	0.017008	0.004		-0.216883	0.343389	0.949809	0.366
LUSC	cg22857947	19	14225039	47955	2	AP	PRKACA	-0.969874	2.11088e-85	1.60427e-83	0.001		0.308957	0.500168	0.95032	0.705
LUSC	cg13411789	6	10528492	75298	6.1	AP	GCNT2	-0.712237	5.57191e-69	2.54079e-67	0.001		0.428571	0.353571	0.93105	0.374
LUSC	cg25397191	19	14224992	47955	2	AP	PRKACA	-1.25976	2.00824e-89	2.2894e-87	0.001		0.204124	0.660642	0.991217	0.862
LUSC	cg19586199	19	14225172	47955	2	AP	PRKACA	-0.908951	5.8717e-117	1.33875e-114	0.001		-0.612372	0.143811	0.728641	0.272
LUSC	cg01596520	19	14225029	47955	2	AP	PRKACA	-1.25361	2.16651e-70	1.23491e-68	0.001		0	1	1	1
LUSC	cg10482201	16	3493423	33519	3.1	AP	NAA60	-0.493994	1.32497e-56	4.31562e-55	0.001		-0.321429	0.497619	0.95032	0.503
LUSC	cg11066033	2	242556858	58392	3	AP	THAP4	-0.729277	6.94543e-57	2.63926e-55	0.001		-0.5	0.266667	0.868571	0.254
LUSC	cg12783819	17	75369657	43715	8	AP	42987	-0.148837	4.37e-30	7.6643e-29	0.001		0.142857	0.78254	0.991217	0.77
LUSC	cg03896694	16	3493440	33519	3.1	AP	NAA60	-0.410979	4.42605e-50	1.12127e-48	0.001		0.321429	0.497619	0.95032	0.507
LUSC	cg26842802	2	202125212	56814	4	AP	CASP8	-0.38277	1.26747e-50	3.6123e-49	0.001		-0.25	0.594841	0.975711	0.604
LUSC	cg24333473	16	3493428	33519	3.1	AP	NAA60	-0.406104	5.54604e-42	1.2645e-40	0.001		0.0357143	0.963492	1	0.959
LUSC	cg07135629	7	30951709	79158	7.1	AP	AQP1	-0.771029	2.95968e-21	2.81169e-20	0.001		-0.642857	0.138889	0.719697	0.129
LUSC	cg09179916	5	38445834	71837	20.1	AP	EGFLAM	-0.96668	5.00097e-26	7.60147e-25	0.001		0.774806	0.0407695	0.619465	0.049
LUSC	cg01343363	16	58533808	36640	7	AP	NDRG4	-0.713592	1.17028e-19	9.88238e-19	0.001		0.558581	0.192453	0.747541	0.215
LUSC	cg27113419	16	58533979	36640	7	AP	NDRG4	-0.847145	1.50312e-18	1.10552e-17	0.001		0.666694	0.10192	0.719697	0.123
LUSC	cg00329447	8	145028170	85515	4	AP	PLEC	-0.153143	1.5592e-21	1.69284e-20	0.001		-0.214286	0.661508	0.991217	0.657
LUSC	cg20689294	10	129846082	13457	6	AP	PTPRE	-1.18831	2.83731e-34	5.88098e-33	0.001		-0.285714	0.555952	0.953061	0.54
LUSC	cg25519926	7	130132360	81804	3	AP	MEST	-0.612682	1.05139e-16	6.30832e-16	0.001		0.321429	0.497619	0.95032	0.499
LUSC	cg27200446	6	41606439	76115	2	AP	MDFI	-0.265631	6.15792e-21	5.61603e-20	0.001		-0.857143	0.0238095	0.598535	0.02
LUSC	cg21200654	7	130132319	81804	3	AP	MEST	-0.678039	1.21993e-15	6.78402e-15	0.001		0.392857	0.395635	0.949524	0.423
LUSC	cg25091228	5	67586433	72291	9	AP	PIK3R1	-0.591869	7.12012e-18	4.77467e-17	0.001		-0.25	0.594841	0.975711	0.606
LUSC	cg15044248	17	75369224	43715	8	AP	42987	-0.105016	2.67894e-11	9.69519e-11	0.001		0.756787	0.0489051	0.619465	0.057
LUSC	cg26486070	22	25003675	61431	3	AP	GGT1	-0.623869	6.97248e-19	5.48181e-18	0.001		-0.392857	0.395635	0.949524	0.394
LUSC	cg26117023	2	74782096	54114	2	AP	DOK1	-0.393539	2.37641e-15	1.29005e-14	0.001		-0.285714	0.555952	0.953061	0.577
LUSC	cg15664152	7	129008407	81744	3	AP	AHCYL2	-0.653149	5.89603e-18	4.07797e-17	0.001		0	1	1	1
LUSC	cg22705386	7	130131797	81804	3	AP	MEST	-0.390845	2.03774e-11	7.49364e-11	0.001		0.321429	0.497619	0.95032	0.483
LUSC	cg02379533	5	154214618	74222	5.1	AP	FAXDC2	-0.895426	6.10191e-14	3.02443e-13	0.001		-0.357143	0.444444	0.95032	0.452
LUSC	cg17300544	17	75369091	43715	8	AP	42987	-0.0865859	1.46475e-11	5.56605e-11	0.001		0.142857	0.78254	0.991217	0.788
LUSC	cg10249538	7	130131829	81804	3	AP	MEST	-0.36237	5.65801e-10	1.72004e-09	0.001		-0.285714	0.555952	0.953061	0.545
LUSC	cg19344806	7	130132298	81804	3	AP	MEST	-0.463725	4.01911e-11	1.43181e-10	0.001		0.357143	0.444444	0.95032	0.478
LUSC	cg22378817	12	54422488	22115	2.1	AP	HOXC6	-0.380973	2.22525e-14	1.15309e-13	0.001		1	1	1	1
LUSC	cg11783497	2	113875292	55028	3	AP	IL1RN	-1.03728	1.22444e-25	1.74483e-24	0.001		0.357143	0.444444	0.95032	0.438
LUSC	cg12441126	7	751962	78509	5	AP	PRKAR1B	-0.151467	2.09519e-12	9.01328e-12	0.001		-0.642857	0.138889	0.719697	0.157
LUSC	cg06212135	7	130131826	81804	3	AP	MEST	-0.405943	5.11704e-10	1.5766e-09	0.001		0.214286	0.661508	0.991217	0.639
LUSC	cg27441225	12	54422350	22115	2.1	AP	HOXC6	-0.368344	3.11001e-13	1.41816e-12	0.001		1	1	1	1
LUSC	cg11941633	12	54422447	22115	2.1	AP	HOXC6	-0.330459	3.46444e-12	1.46276e-11	0.001		1	1	1	1
LUSC	cg25246246	17	43503131	41957	6	AP	ARHGAP27	-0.841343	3.73305e-12	1.54752e-11	0.001		0.107143	0.839683	1	0.831
LUSC	cg12492087	15	42749885	30163	4.1	AP	ZNF106	-0.252642	5.81343e-14	2.94547e-13	0.001		-0.428571	0.353571	0.93105	0.352
LUSC	cg06794543	15	42749748	30163	4.1	AP	ZNF106	-0.274865	3.34714e-16	1.90787e-15	0.001		-0.285714	0.555952	0.953061	0.553
LUSC	cg27200006	22	25003854	61431	3	AP	GGT1	-0.506917	2.43775e-13	1.15793e-12	0.001		-0.821429	0.034127	0.598535	0.027
LUSC	cg27589003	7	130132286	81804	3	AP	MEST	-0.461868	4.81128e-10	1.52357e-09	0.001		-0.785714	0.0480159	0.619465	0.04
LUSC	cg16823958	7	130131869	81804	3	AP	MEST	-0.389147	4.79038e-09	1.31591e-08	0.001		-0.25	0.594841	0.975711	0.585
LUSC	cg03244997	17	43503144	41957	6	AP	ARHGAP27	-0.89596	1.6015e-11	5.98592e-11	0.001		0.178571	0.713095	0.991217	0.703
LUSC	cg01784351	7	130132265	81804	3	AP	MEST	-0.354903	3.4122e-09	9.48759e-09	0.001		0.0714286	0.906349	1	0.912
LUSC	cg26074140	1	44401309	2483	4.1	AP	ARTN	-0.270139	1.30831e-12	5.8489e-12	0.001		-1	1	1	1
LUSC	cg08841511	10	86184581	12406	5	AP	CCSER2	-0.93824	5.33833e-17	3.28956e-16	0.001		-0.535714	0.235714	0.826813	0.226
LUSC	cg07243548	1	108231160	3928	18.1	AP	VAV3	-0.387894	1.80497e-07	4.2868e-07	0.001		-0.704187	0.0773502	0.717347	0.099
LUSC	cg06452769	8	145028093	85515	4	AP	PLEC	-0.0953248	4.38599e-10	1.40846e-09	0.001		-0.178571	0.713095	0.991217	0.752
LUSC	cg16559243	5	38445612	71837	20.1	AP	EGFLAM	-0.636708	2.16517e-09	6.24883e-09	0.001		0.414431	0.355269	0.93105	0.345
LUSC	cg03804136	17	75369219	43715	8	AP	42987	-0.103232	8.98284e-11	3.05685e-10	0.001		0.714286	0.0880952	0.717347	0.108
LUSC	cg17998964	11	63655903	16537	2	AP	MARK2	-0.717158	3.14125e-24	4.21297e-23	0.001		0	1	1	1
LUSC	cg04551925	7	30951740	79158	7.1	AP	AQP1	-0.440348	8.69068e-08	2.15378e-07	0.001		-0.642857	0.138889	0.719697	0.136
LUSC	cg23212751	1	44401433	2483	4.1	AP	ARTN	-0.261138	1.01921e-13	4.94427e-13	0.001		-1	1	1	1
LUSC	cg03402235	15	42749336	30163	4.1	AP	ZNF106	-0.258761	1.18292e-11	4.6501e-11	0.001		-0.428571	0.353571	0.93105	0.369
LUSC	cg10132917	7	30951801	79158	7.1	AP	AQP1	-0.333735	1.08728e-05	2.2448e-05	0.001		-0.642857	0.138889	0.719697	0.135
LUSC	cg07186032	3	56950340	65358	7	AP	ARHGEF3	-0.251811	2.04567e-12	8.96949e-12	0.001		-0.428571	0.353571	0.93105	0.354
LUSC	cg17023856	1	2036508	235	8	AP	PRKCZ	-0.355091	1.34193e-17	8.74172e-17	0.001		0.178571	0.713095	0.991217	0.692
LUSC	cg07883124	13	113634042	26317	8	AP	MCF2L	-0.773647	2.52359e-08	6.61354e-08	0.001		-0.392857	0.395635	0.949524	0.385
LUSC	cg01613817	21	39870397	60589	5	AP	ERG	-0.696759	8.89596e-10	2.63413e-09	0.001		0.428571	0.353571	0.93105	0.365
LUSC	cg18045152	19	35992984	49131	17	AP	DMKN	-0.35806	1.01869e-11	4.07475e-11	0.001		-0.374352	0.408058	0.95032	0.435
LUSC	cg09916174	7	134576049	81858	5	AP	CALD1	-0.639768	7.43891e-12	3.0287e-11	0.001		0.0714286	0.906349	1	0.918
LUSC	cg21203569	11	47279365	15694	2	AP	NR1H3	-0.138483	2.13696e-10	6.96039e-10	0.001		-0.178571	0.713095	0.991217	0.709
LUSC	cg23930313	12	25056083	20753	2	AP	BCAT1	-0.195791	1.838e-08	4.93015e-08	0.001		0.821429	0.034127	0.598535	0.028
LUSC	cg27139805	19	35992791	49131	17	AP	DMKN	-0.370526	6.63813e-11	2.29317e-10	0.001		-0.394055	0.381736	0.949524	0.377
LUSC	cg18273417	1	153518418	7711	2	AP	S100A4	-0.312165	6.73123e-10	2.01937e-09	0.001		-0.571429	0.2	0.747541	0.188
LUSC	cg17382841	5	38445614	71837	20.1	AP	EGFLAM	-0.75182	1.25801e-06	2.83987e-06	0.001		0.414431	0.355269	0.93105	0.346
LUSC	cg26489413	11	10476976	14345	3	AP	AMPD3	-0.35228	1.6558e-10	5.47133e-10	0.001		-0.414431	0.355269	0.93105	0.338
LUSC	cg21048812	19	35992883	49131	17	AP	DMKN	-0.302647	3.3298e-09	9.37277e-09	0.001		-0.866921	0.0115355	0.598535	0.029
LUSC	cg23497020	12	50616562	21688	4.1	AP	LIMA1	-0.532018	5.31318e-24	6.73003e-23	0.001		-0.392857	0.395635	0.949524	0.381
LUSC	cg01411786	1	201709390	9387	6	AP	NAV1	-1.30324	5.60012e-31	1.06402e-29	0.001		-0.285714	0.555952	0.953061	0.56
LUSC	cg16317901	17	75283800	43726	3.1	AP	42987	-0.215109	2.48238e-08	6.58118e-08	0.001		-0.571429	0.2	0.747541	0.214
LUSC	cg11827925	7	30951498	79158	7.1	AP	AQP1	-0.226877	2.86315e-05	5.43998e-05	0.001		-0.678571	0.109524	0.719697	0.099
LUSC	cg02059867	17	38334623	40846	2	AP	RAPGEFL1	-0.412807	1.38629e-20	1.21567e-19	0.001		-0.481812	0.273587	0.878561	0.314
LUSC	cg01826354	17	81006497	44426	2.1	AP	B3GNTL1	-0.230363	6.0582e-07	1.39522e-06	0.001		-0.214286	0.661508	0.991217	0.666
LUSC	cg04372674	7	30951381	79158	7.1	AP	AQP1	-0.205985	3.48832e-05	6.51916e-05	0.001		-0.642857	0.138889	0.719697	0.164
LUSC	cg17094065	12	53443584	21925	3	AP	TENC1	-0.230935	7.54268e-06	1.59234e-05	0.001		0.285714	0.555952	0.953061	0.581
LUSC	cg00536939	11	47279352	15694	2	AP	NR1H3	-0.169842	1.0777e-07	2.6421e-07	0.001		-0.252262	0.585241	0.975711	0.575
LUSC	cg08625380	6	41605994	76115	2	AP	MDFI	-0.219432	5.54589e-08	1.38952e-07	0.001		-0.214286	0.661508	0.991217	0.674
LUSC	cg25075794	7	30951392	79158	7.1	AP	AQP1	-0.184551	0.000129805	0.000217615	0.001		-0.642857	0.138889	0.719697	0.147
LUSC	cg05577434	22	25003527	61431	3	AP	GGT1	-0.544801	4.51721e-08	1.14436e-07	0.001		-0.285714	0.555952	0.953061	0.568
LUSC	cg25230363	7	30951425	79158	7.1	AP	AQP1	-0.230348	1.17822e-05	2.39852e-05	0.001		-0.714286	0.0880952	0.717347	0.067
LUSC	cg05091570	1	201709336	9387	6	AP	NAV1	-1.2004	7.38447e-29	1.20261e-27	0.001		-0.678571	0.109524	0.719697	0.102
LUSC	cg10537193	22	32026975	61881	4	AP	PISD	-0.407246	2.89285e-13	1.34606e-12	0.001		-0.107143	0.839683	1	0.848
LUSC	cg13877974	1	201708888	9387	6	AP	NAV1	-1.43491	1.61572e-23	1.93886e-22	0.001		-0.464286	0.302381	0.919238	0.304
LUSC	cg26577320	1	15272326	732	4	AP	KAZN	-0.306258	0.000207897	0.000331472	0.001		0.0714286	0.906349	1	0.91
LUSC	cg22123459	22	25003499	61431	3	AP	GGT1	-0.584812	1.43602e-07	3.4831e-07	0.001		-0.0714286	0.906349	1	0.914
LUSC	cg22480742	7	134576386	81858	5	AP	CALD1	-0.589191	5.07817e-09	1.37836e-08	0.001		-0.857143	0.0238095	0.598535	0.032
LUSC	cg10250177	1	32739752	1579	2	AP	LCK	-0.601515	2.04166e-05	4.01292e-05	0.001		-0.177325	0.703674	0.991217	0.701
LUSC	cg14909730	6	10415667	75291	3.1	AP	TFAP2A	-0.289877	1.34225e-09	3.92351e-09	0.001		-0.737865	0.262135	0.868571	0.34
LUSC	cg26923410	7	30951432	79158	7.1	AP	AQP1	-0.236136	1.91446e-05	3.79562e-05	0.001		-0.571429	0.2	0.747541	0.17
LUSC	cg06520450	3	189507396	68093	4	AP	TP63	-0.130728	1.38194e-05	2.76387e-05	0.001		-0.809091	0.0275166	0.598535	0.038
LUSC	cg15373767	7	30951328	79158	7.1	AP	AQP1	-0.219703	8.6568e-05	0.000149527	0.002		-0.321429	0.497619	0.95032	0.506
LUSC	cg22601415	10	61900940	11845	28	AP	ANK3	-0.338884	1.23983e-06	2.82681e-06	0.001		-0.357143	0.444444	0.95032	0.466
LUSC	cg18260397	5	154230438	74223	3	AP	FAXDC2	-0.502752	2.39763e-07	5.63566e-07	0.001		0.142857	0.78254	0.991217	0.778
LUSC	cg18080604	7	30951492	79158	7.1	AP	AQP1	-0.238408	0.000111889	0.000188967	0.002		-0.571429	0.2	0.747541	0.181
LUSC	cg04802386	4	103998345	70169	6	AP	SLC9B2	-0.298149	3.57317e-06	7.75888e-06	0.001		-0.464286	0.302381	0.919238	0.313
LUSC	cg01422467	4	103998289	70169	6	AP	SLC9B2	-0.28645	2.18944e-06	4.84652e-06	0.001		-0.75	0.0662698	0.717347	0.063
LUSC	cg10344477	17	81006524	44426	2.1	AP	B3GNTL1	-0.150931	1.09286e-05	2.2448e-05	0.001		0.142857	0.78254	0.991217	0.784
LUSC	cg14376467	4	86851411	69815	6	AP	ARHGAP24	-0.0304386	5.41923e-05	9.80622e-05	0.001		-0.428571	0.353571	0.93105	0.341
LUSC	cg07233343	1	17944660	858	10	AP	ARHGEF10L	-0.382087	0.00223146	0.00312131	0.002		0.285714	0.555952	0.953061	0.55
LUSC	cg05824218	17	38499096	40858	5	AP	RARA	-0.185376	2.53855e-06	5.56528e-06	0.001		0.357143	0.444444	0.95032	0.428
LUSC	cg13889934	4	86851399	69815	6	AP	ARHGAP24	-0.0326027	7.16518e-05	0.00012763	0.001		-0.571429	0.2	0.747541	0.171
LUSC	cg21446955	4	86851425	69815	6	AP	ARHGAP24	-0.034051	2.83074e-05	5.42361e-05	0.001		-0.142857	0.78254	0.991217	0.797
LUSC	cg13342364	17	75283939	43726	3.1	AP	42987	-0.201201	4.24133e-05	7.73619e-05	0.001		-0.107143	0.839683	1	0.836
LUSC	cg16023122	1	201708836	9387	6	AP	NAV1	-1.5593	1.8828e-21	1.95126e-20	0.001		-0.535714	0.235714	0.826813	0.234
LUSC	cg01828733	1	201708932	9387	6	AP	NAV1	-1.15669	7.41554e-22	8.45372e-21	0.001		-0.428571	0.353571	0.93105	0.375
LUSC	cg15826437	17	38334186	40846	2	AP	RAPGEFL1	-0.715828	5.90232e-18	4.07797e-17	0.001		-0.185312	0.690778	0.991217	0.722
LUSC	cg05267952	19	51529918	51268	3	AP	KLK11	-0.307019	0.000251441	0.000398115	0.001		-0.607143	0.166667	0.747541	0.174
LUSC	cg18810947	19	12831659	47845	5.1	AP	TNPO2	-0.0447619	8.38757e-05	0.000147593	0.001		0.142857	0.78254	0.991217	0.799
LUSC	cg11648522	1	15272238	732	4	AP	KAZN	-0.244063	0.00232712	0.00323527	0.004		-0.214286	0.661508	0.991217	0.67
LUSC	cg21733927	17	75283979	43726	3.1	AP	42987	-0.168683	9.36355e-05	0.000160518	0.001		-0.607143	0.166667	0.747541	0.167
LUSC	cg12708802	3	50388878	65052	1.4	AA	CYB561D2	-0.332018	6.57899e-05	0.000118111	0.001		-0.392857	0.395635	0.949524	0.394
LUSC	cg16768966	17	9940227	39261	4	AP	GAS7	-0.158889	0.000672404	0.00100201	0.004		0.178571	0.713095	0.991217	0.72
LUSC	cg09676669	7	30951272	79158	7.1	AP	AQP1	-0.197157	0.00058855	0.000882825	0.001		-0.642857	0.138889	0.719697	0.13
LUSC	cg20902783	14	21494071	26484	2	AP	NDRG2	-0.0505503	0.0028729	0.00396983	0.002		0.464286	0.302381	0.919238	0.311
LUSC	cg19318380	19	51529902	51268	3	AP	KLK11	-0.28942	0.00148581	0.00211728	0.004		-0.107143	0.839683	1	0.835
LUSC	cg26310000	19	51529846	51268	3	AP	KLK11	-0.288955	0.000505424	0.000768245	0.001		0.107143	0.839683	1	0.848
LUSC	cg14603620	17	38334166	40846	2	AP	RAPGEFL1	-0.657964	3.70903e-19	3.02021e-18	0.001		-0.185312	0.690778	0.991217	0.739
LUSC	cg16871519	6	10415597	75291	3.1	AP	TFAP2A	-0.31055	5.05847e-10	1.5766e-09	0.001		-0.737865	0.262135	0.868571	0.345
LUSC	cg08207895	3	50388901	65052	1.4	AA	CYB561D2	-0.227053	0.000321978	0.00049602	0.001		0	1	1	1
LUSC	cg25813864	17	38334176	40846	2	AP	RAPGEFL1	-0.612584	9.39579e-19	7.1408e-18	0.001		-0.0370625	0.937124	1	0.973
LUSC	cg00411097	7	1596050	78583	2	AP	TMEM184A	-0.786289	3.9895e-05	7.33554e-05	0.001		-0.258199	0.741801	0.991217	1
LUSC	cg01399319	1	1326204	160	6.1:7.1	ES	CCNL2	-1.04174	0.00524414	0.00711705	0.006		0.571429	0.2	0.747541	0.202
LUSC	cg04682802	20	11898478	58698	2.1:2.2	AA	BTBD3	-0.166238	0.000519214	0.000783978	0.001		-0.214286	0.661508	0.991217	0.665
LUSC	cg09141303	4	103998291	70169	6	AP	SLC9B2	-0.227321	0.000310211	0.000483182	0.001		-0.321429	0.497619	0.95032	0.474
LUSC	cg15602548	2	54786148	53577	3	AP	SPTBN1	-0.546057	3.21579e-15	1.70512e-14	0.001		0.607143	0.166667	0.747541	0.152
LUSC	cg10633906	7	1595602	78583	2	AP	TMEM184A	-0.678088	2.09494e-05	4.08245e-05	0.001		0.258199	0.741801	0.991217	1
LUSC	cg12503394	7	1596118	78583	2	AP	TMEM184A	-0.610048	8.55875e-05	0.000148961	0.001		-0.258199	0.741801	0.991217	1
LUSC	cg03763518	1	150245044	7454	3.1	AP	C1orf54	-0.0888737	0.00103789	0.00151691	0.002		-0.214286	0.661508	0.991217	0.626
LUSC	cg25433648	1	153588782	7727	3	AP	S100A14	-0.316259	0.00126995	0.00183259	0.002		-0.214286	0.661508	0.991217	0.686
LUSC	cg05822633	20	11898531	58698	2.1:2.2	AA	BTBD3	-0.17083	0.00142652	0.00204558	0.003		0.321429	0.497619	0.95032	0.501
LUSC	cg08615111	1	2435555	274	22.2:23.1	ES	PLCH2	-0.352325	2.1861e-05	4.22398e-05	0.001		NA	NA	NA	#N/A
LUSC	cg05439665	13	113656424	26318	10	AP	MCF2L	-0.299476	0.000155704	0.000253575	0.002		-0.785714	0.0480159	0.619465	0.049
LUSC	cg07693270	3	186856928	68071	3	AP	RPL39L	-0.327354	0.000153348	0.000251534	0.001		0.285714	0.555952	0.953061	0.532
LUSC	cg00578638	17	38334161	40846	2	AP	RAPGEFL1	-0.638499	2.71307e-16	1.5861e-15	0.001		0.0741249	0.874507	1	0.897
LUSC	cg21368161	7	1596136	78583	2	AP	TMEM184A	-0.555384	0.00183865	0.00260381	0.003		0.258199	0.741801	0.991217	1
LUSC	cg01444716	20	11898557	58698	2.1:2.2	AA	BTBD3	-0.137926	0.00203068	0.002858	0.004		0.0714286	0.906349	1	0.892
LUSC	cg14326991	6	46889760	76427	2	AP	GPR116	-0.142816	0.0143256	0.0185582	0.009		-0.5	0.266667	0.868571	0.279
LUSC	cg18808904	20	11898851	58698	2.1:2.2	AA	BTBD3	-0.200589	0.000867946	0.00127672	0.001		-0.357143	0.444444	0.95032	0.486
LUSC	cg18552482	12	122690827	24931	2.1:2.2	AA	B3GNT4	-0.426652	0.00941923	0.0123424	0.009		1	1	1	1
LUSC	cg08814947	19	51529999	51268	3	AP	KLK11	-0.222221	0.0332156	0.0416108	0.032		0.357143	0.444444	0.95032	0.452
LUSC	cg27097846	12	53443485	21925	3	AP	TENC1	-0.180281	0.0399561	0.0492431	0.038		0.321429	0.497619	0.95032	0.51
LUSC	cg15576517	19	7711153	47123	17.1	AP	STXBP2	-0.160588	0.00962386	0.0125385	0.012		-0.714286	0.0880952	0.717347	0.1
LUSC	cg18552482	12	122690827	24930	2.2	RI	B3GNT4	-0.411923	0.00795191	0.0105409	0.008		NA	NA	NA	#N/A
LUSC	cg09545109	3	50388910	65052	1.4	AA	CYB561D2	-0.199296	0.00757702	0.0101027	0.006		-0.785714	0.0480159	0.619465	0.047
LUSC	cg17697835	17	75283832	43726	3.1	AP	42987	-0.104621	0.0202837	0.0258362	0.018		-0.321429	0.497619	0.95032	0.507
LUSC	cg23209302	1	1326152	160	6.1:7.1	ES	CCNL2	-0.630117	0.0269164	0.0339058	0.028		0.642857	0.138889	0.719697	0.119
LUSC	cg26149678	11	71709917	17487	1.2	RI	IL18BP	0.178192	0.0197659	0.0253182	0.024		0.885714	0.0333333	0.598535	0.021
LUSC	cg24402880	4	84035837	69771	5	AP	PLAC8	0.268799	0.00347205	0.00476884	0.005		0.142857	0.78254	0.991217	0.786
LUSC	cg27139457	2	85637739	54272	2	AP	CAPG	0.244702	0.000159079	0.000257235	0.001		0.357143	0.444444	0.95032	0.453
LUSC	cg16749930	11	71709978	17487	1.2	RI	IL18BP	0.267211	0.00537059	0.00724554	0.003		0.942857	0.0166667	0.598535	0.018
LUSC	cg26149678	11	71709917	17503	1.2:1.3:1.4:1.5:1.6	AD	IL18BP	0.321943	0.00107186	0.00155659	0.004		0.892857	0.0123016	0.598535	0.015
LUSC	cg23510527	2	234601443	58059	2.1	AP	UGT1A6	0.155204	0.000107462	0.000182845	0.001		0.3	0.683333	0.991217	0.688
LUSC	cg05169951	16	3017955	33318	7.4	RI	KREMEN2	0.32472	0.000141632	0.000234	0.001		NA	NA	NA	#N/A
LUSC	cg05387167	17	46629804	42193	9.1	AP	HOXB3	0.273095	0.000440043	0.000673355	0.002		-0.857143	0.0238095	0.598535	0.022
LUSC	cg26683005	19	48752990	50719	2.2:2.3	AD	CARD8	0.339747	3.68986e-05	6.83975e-05	0.001		0.392857	0.395635	0.949524	0.395
LUSC	cg10304824	2	177028804	56114	4	AP	HOXD3	0.360295	0.000311525	0.000483182	0.001		NA	NA	NA	#N/A
LUSC	cg16749930	11	71709978	17503	1.2:1.3:1.4:1.5:1.6	AD	IL18BP	0.450472	0.000301732	0.000474447	0.001		0.964286	0.00277778	0.598535	0.002
LUSC	cg16552128	16	2325856	33266	33	AT	ABCA3	0.238322	3.35888e-08	8.70256e-08	0.001		0	1	1	1
LUSC	cg07215695	2	85637834	54272	2	AP	CAPG	0.298585	3.85149e-06	8.28434e-06	0.001		-0.142857	0.78254	0.991217	0.779
LUSC	cg03906115	2	33359529	53180	5.1	AP	LTBP1	0.542035	3.20226e-05	6.03401e-05	0.001		-0.324337	0.477885	0.95032	0.458
LUSC	cg23981871	2	177028714	56114	4	AP	HOXD3	0.295663	8.41538e-05	0.000147593	0.001		NA	NA	NA	#N/A
LUSC	cg26149678	11	71709917	17496	1.2:1.3:1.4:1.5:1.6:1.7	RI	IL18BP	0.509678	5.18382e-06	1.10459e-05	0.001		0.607143	0.166667	0.747541	0.156
LUSC	cg09387749	2	177028680	56114	4	AP	HOXD3	0.29931	1.21082e-05	2.44307e-05	0.001		NA	NA	NA	#N/A
LUSC	cg01128482	2	177028621	56114	4	AP	HOXD3	0.317345	1.04422e-05	2.18423e-05	0.001		NA	NA	NA	#N/A
LUSC	cg00931491	16	28608288	35811	1.2:1.3	RI	SULT1A2	0.524314	4.70501e-07	1.09464e-06	0.001		-0.285714	0.555952	0.953061	0.547
LUSC	cg12634591	2	177028606	56114	4	AP	HOXD3	0.402158	1.84033e-06	4.11368e-06	0.001		NA	NA	NA	#N/A
LUSC	cg16749930	11	71709978	17496	1.2:1.3:1.4:1.5:1.6:1.7	RI	IL18BP	0.765171	3.73685e-08	9.57306e-08	0.001		0.642857	0.138889	0.719697	0.141
LUSC	cg11269599	19	52391304	51381	1.2:1.3	RI	ZNF577	0.209162	5.66533e-11	1.98722e-10	0.001		0.107143	0.839683	1	0.837
LUSC	cg26476820	2	85637851	54272	2	AP	CAPG	0.3467	2.59301e-09	7.39007e-09	0.001		-0.285714	0.555952	0.953061	0.593
LUSC	cg10635122	19	52391090	51381	1.2:1.3	RI	ZNF577	0.203568	1.28126e-10	4.296e-10	0.001		0.142857	0.78254	0.991217	0.776
LUSC	cg03562414	19	52391078	51381	1.2:1.3	RI	ZNF577	0.20566	1.39664e-11	5.3972e-11	0.001		-0.535714	0.235714	0.826813	0.231
LUSC	cg07164388	14	24779400	26961	1.2:1.3	RI	LTB4R2	0.641415	2.44861e-21	2.42732e-20	0.001		0.321429	0.497619	0.95032	0.505
LUSC	cg00136547	6	56507796	76555	16	AP	DST	-0.514657	3.14671e-17	1.99292e-16	0.001		-0.882919	0.00845034	0.598535	0.013
LUSC	cg02090883	16	2762819	33295	6	AT	PRSS27	0.1599	0.00578931	0.00776448	0.005		-0.162169	0.7283	0.991217	0.732
LUSC	cg06665622	6	46293571	76415	4	AP	RCAN2	-0.236631	0.015312	0.019724	0.017		0.214286	0.661508	0.991217	0.656
LUSC	cg08036668	15	49462157	30518	3.1	AP	GALK2	-0.164295	0.00823148	0.0108484	0.008		-0.178571	0.713095	0.991217	0.716
LUSC	cg09757109	11	111848638	18707	8	AP	DIXDC1	-0.12104	0.0458367	0.0561869	0.041		0.714286	0.0880952	0.717347	0.088
LUSC	cg13447099	1	21606051	964	4.1	AP	ECE1	0.0672764	0.0341707	0.0425733	0.037		-0.214286	0.661508	0.991217	0.646
LUSC	cg13781574	X	69675294	89380	12	AP	DLG3	-0.1651	0.000758248	0.0011226	0.002		-0.464286	0.302381	0.919238	0.295
LUSC	cg13987674	1	24649494	1097	2	AP	GRHL3	0.0842202	0.0213653	0.0270627	0.027		NA	NA	NA	#N/A
LUSC	cg13997435	1	153538406	7720	3	AP	S100A2	-0.269555	1.56614e-07	3.75872e-07	0.001		-0.642857	0.138889	0.719697	0.128
LUSC	cg15797286	8	18067416	82851	3	AP	NAT1	-0.169608	0.0347759	0.0430919	0.032		0.142857	0.78254	0.991217	0.775
PRAD	cg00060374	1	1355235	167	2	ES	ANKRD65	0.551907	1.44115e-14	2.45161e-14	0.001		-0.0944044	0.589592	0.769379	0.563
PRAD	cg00307662	16	29917305	35984	3.2	AT	ASPHD1	0.331043	9.26528e-09	1.26969e-08	0.001		-0.0686177	0.699796	0.821983	0.695
PRAD	cg00578638	17	38334161	40846	2	AP	RAPGEFL1	-0.298386	7.53309e-07	9.52904e-07	0.001		-0.0861186	0.628193	0.781282	0.616
PRAD	cg00615377	22	36236649	61982	3	AP	RBFOX2	-0.624753	8.51299e-65	1.25992e-62	0.001		-0.0728393	0.677537	0.816939	0.659
PRAD	cg00856997	4	2366103	68557	2	AP	ZFYVE28	-0.784725	2.0948e-13	3.33366e-13	0.001		-0.397433	0.0199373	0.086786	0.02
PRAD	cg01251603	15	26874098	29733	9	AP	GABRB3	-0.548719	1.01424e-15	1.9751e-15	0.001		-0.224802	0.259601	0.457393	0.255
PRAD	cg01368763	X	153072706	90509	3.1:3.2:5	ES	PDZD4	0.441911	1.49895e-11	2.24085e-11	0.001		-0.0686647	0.728453	0.835745	0.737
PRAD	cg01574481	14	24641852	26881	1.2	RI	REC8	0.47576	5.22173e-09	7.29072e-09	0.001		0.0619048	0.723083	0.835745	0.716
PRAD	cg02059867	17	38334623	40846	2	AP	RAPGEFL1	-0.610719	2.15944e-15	4.0974e-15	0.001		-0.00367113	0.98356	0.992953	0.984
PRAD	cg02499249	3	25469720	63744	2.1	AP	RARB	-0.522482	9.00767e-31	3.79112e-30	0.001		-0.256857	0.142531	0.326216	0.14
PRAD	cg02564134	3	125899754	66578	2	AP	ALDH1L1	-0.146701	1.92266e-21	5.26952e-21	0.001		-0.56143	0.000551056	0.00906181	<0.001
PRAD	cg02938601	8	22961088	83065	4.3	AT	TNFRSF10C	0.458595	1.69707e-23	5.23264e-23	0.001		-0.0172245	0.921767	0.953997	0.912
PRAD	cg03168947	3	42201649	64266	5	AP	TRAK1	-0.46218	1.94583e-17	4.23504e-17	0.001		-0.163282	0.363914	0.583619	0.369
PRAD	cg03481274	3	25469708	63744	2.1	AP	RARB	-0.581567	3.9467e-31	1.71798e-30	0.001		-0.220949	0.20921	0.404204	0.219
PRAD	cg03724721	22	19939061	61096	3	AP	COMT	-0.402879	7.48302e-38	5.82888e-37	0.001		-0.144472	0.407656	0.62847	0.409
PRAD	cg03562414	19	52391078	51381	1.2:1.3	RI	ZNF577	0.271666	3.82428e-37	2.69521e-36	0.001		0.473142	0.00409765	0.0288787	0.006
PRAD	cg03763518	1	150245044	7454	3.1	AP	C1orf54	-0.393237	1.02709e-13	1.65227e-13	0.001		0.0507003	0.771821	0.87178	0.756
PRAD	cg04178858	17	38334170	40846	2	AP	RAPGEFL1	-0.19121	1.54398e-05	1.84282e-05	0.001		-0.0192764	0.913833	0.953997	0.907
PRAD	cg04474375	X	137793820	90232	4	AP	FGF13	-0.137969	7.96341e-18	1.84154e-17	0.001		-0.0322197	0.854218	0.909527	0.843
PRAD	cg04554033	17	77020041	43985	2.1	AP	C1QTNF1	-0.112338	0.00131086	0.00146975	0.002		-0.421038	0.0117773	0.0581016	0.01
PRAD	cg05324776	11	70002020	17387	17	ES	ANO1	0.302342	2.58859e-06	3.16621e-06	0.001		0.279011	0.104563	0.266816	0.101
PRAD	cg05711445	7	139528855	81964	5.1	AP	TBXAS1	0.24573	0.0341808	0.035625	0.031		0.256302	0.163995	0.358835	0.178
PRAD	cg04767756	16	10652706	33987	2	AP	EMP2	-0.375703	3.01279e-21	8.10714e-21	0.001		-0.632301	4.60523e-05	0.00136315	<0.001
PRAD	cg05882938	3	186857284	68071	3	AP	RPL39L	-0.408021	1.30048e-18	3.0551e-18	0.001		-0.343417	0.0440114	0.144748	0.037
PRAD	cg05576959	11	46366833	15541	2	AP	DGKZ	-1.02342	6.64092e-55	1.96571e-53	0.001		-0.464426	0.00537737	0.0346022	0.005
PRAD	cg06098693	11	70002283	17387	17	ES	ANO1	0.565014	2.47253e-16	4.94507e-16	0.001		0.406891	0.0152756	0.0706498	0.016
PRAD	cg06186450	1	154942910	7855	2.1	AP	SHC1	-0.354392	6.48893e-21	1.71493e-20	0.001		-0.337979	0.0470597	0.148188	0.054
PRAD	cg06061966	11	46366643	15541	2	AP	DGKZ	-0.838437	6.79092e-56	2.51264e-54	0.001		-0.487395	0.00331882	0.027288	0.005
PRAD	cg06711837	X	137792814	90232	4	AP	FGF13	-0.256232	3.68675e-25	1.21253e-24	0.001		-0.403838	0.0161352	0.0723641	0.02
PRAD	cg06720425	3	25469694	63744	2.1	AP	RARB	-0.742587	9.22165e-31	3.79112e-30	0.001		-0.325923	0.0599605	0.179814	0.065
PRAD	cg06525551	X	137792939	90232	4	AP	FGF13	-0.177126	2.96416e-22	8.60189e-22	0.001		-0.474156	0.00400776	0.0288787	0.005
PRAD	cg06787004	22	19938981	61096	3	AP	COMT	-0.432501	1.66535e-38	1.54044e-37	0.001		-0.122148	0.484539	0.688495	0.481
PRAD	cg07005055	1	113052167	4199	3	AP	WNT2B	-0.342767	5.67972e-08	7.37368e-08	0.001		-0.119616	0.493708	0.688495	0.462
PRAD	cg07164388	14	24779400	26961	1.2:1.3	RI	LTB4R2	0.561049	1.68547e-10	2.39856e-10	0.001		0.133145	0.475199	0.6864	0.445
PRAD	cg06958211	15	40532180	29958	2	AP	PAK6	-0.568282	4.05235e-41	4.61344e-40	0.001		-0.5412	0.00114498	0.0115266	0.002
PRAD	cg07215695	2	85637834	54272	2	AP	CAPG	0.735491	5.45873e-22	1.52433e-21	0.001		-0.128011	0.462153	0.6864	0.471
PRAD	cg07312051	1	15656086	747	15.2	AT	FHAD1	-0.520105	7.67097e-07	9.62122e-07	0.001		-0.0722689	0.678943	0.816939	0.68
PRAD	cg07441272	3	186857475	68071	3	AP	RPL39L	-0.311127	1.53139e-12	2.3609e-12	0.001		-0.283773	0.0985316	0.255836	0.099
PRAD	cg07781162	17	74533951	43591	2	AP	CYGB	0.089978	0.014827	0.0159014	0.009		-0.0280112	0.873034	0.922922	0.884
PRAD	cg08146609	7	18535232	78887	4	AP	HDAC9	-0.701031	1.24097e-22	3.74824e-22	0.001		-0.360198	0.036389	0.1309	0.032
PRAD	cg07663278	12	51663310	21828	3.1	AP	SMAGP	-0.316966	6.4827e-12	9.7902e-12	0.001		-0.448071	0.00694824	0.0428475	0.011
PRAD	cg07693270	3	186856928	68071	3	AP	RPL39L	-0.623584	1.6218e-37	1.20013e-36	0.001		0.446499	0.00767897	0.0454595	0.016
PRAD	cg08309809	8	22960572	83065	4.3	AT	TNFRSF10C	0.394439	3.97523e-22	1.13141e-21	0.001		0.269098	0.118011	0.296027	0.114
PRAD	cg07998213	11	46366813	15541	2	AP	DGKZ	-0.810971	1.47284e-47	2.1798e-46	0.001		-0.541737	0.000930263	0.0114732	0.001
PRAD	cg08481491	3	125900108	66578	2	AP	ALDH1L1	-0.169761	2.84503e-17	6.01521e-17	0.001		-0.436822	0.0103806	0.0529767	0.012
PRAD	cg09538651	11	70001896	17387	17	ES	ANO1	0.445285	6.39336e-13	9.96018e-13	0.001		0.430733	0.00979316	0.0517638	0.005
PRAD	cg09989727	15	57544645	30789	18	ES	TCF12	0.239286	3.10125e-05	3.67188e-05	0.001		0.118504	0.497763	0.688495	0.505
PRAD	cg10093739	17	45917418	42123	3:4.1	ES	SCRN2	0.372309	6.32759e-05	7.31627e-05	0.001		-0.0898241	0.613424	0.769379	0.592
PRAD	cg10635122	19	52391090	51381	1.2:1.3	RI	ZNF577	0.28677	1.0419e-36	6.70437e-36	0.001		0.36137	0.0329313	0.128259	0.037
PRAD	cg10712623	3	25469577	63744	2.1	AP	RARB	-0.631743	4.3822e-26	1.50829e-25	0.001		-0.304378	0.0800797	0.223619	0.067
PRAD	cg10761979	3	125899144	66577	3	AP	ALDH1L1	-0.523795	5.85617e-14	9.63015e-14	0.001		-0.0360608	0.83955	0.901256	0.856
PRAD	cg10783469	19	52391234	51380	1.3	RI	ZNF577	0.157065	3.16262e-15	5.77861e-15	0.001		0.23288	0.178207	0.376781	0.182
PRAD	cg11009245	3	125899150	66577	3	AP	ALDH1L1	-0.466524	1.50904e-14	2.53794e-14	0.001		-0.0898464	0.613335	0.769379	0.586
PRAD	cg11269599	19	52391304	51381	1.2:1.3	RI	ZNF577	0.28923	2.35274e-35	1.39282e-34	0.001		0.384368	0.0226235	0.0954951	0.025
PRAD	cg11321459	7	18535263	78887	4	AP	HDAC9	-0.670344	3.01444e-24	9.49229e-24	0.001		-0.344161	0.0462528	0.148188	0.056
PRAD	cg12081743	7	18535499	78887	4	AP	HDAC9	-0.513272	6.72278e-17	1.3819e-16	0.001		-0.260833	0.136239	0.320053	0.151
PRAD	cg12479047	3	25469573	63744	2.1	AP	RARB	-0.543849	5.27782e-25	1.69808e-24	0.001		-0.358093	0.0375769	0.1309	0.045
PRAD	cg12728623	22	19938992	61096	3	AP	COMT	-0.447503	1.6454e-39	1.73943e-38	0.001		-0.127203	0.466504	0.6864	0.454
PRAD	cg14015044	8	22960619	83065	4.3	AT	TNFRSF10C	0.479546	1.46239e-19	3.66837e-19	0.001		0.344804	0.0425105	0.14299	0.039
PRAD	cg14603620	17	38334166	40846	2	AP	RAPGEFL1	-0.222252	1.29223e-06	1.59375e-06	0.001		-0.106769	0.547841	0.737095	0.544
PRAD	cg14859324	15	26874363	29733	9	AP	GABRB3	-0.322812	2.38888e-10	3.36718e-10	0.001		-0.194258	0.331588	0.550518	0.328
PRAD	cg13247398	11	46366840	15541	2	AP	DGKZ	-0.879913	8.09066e-54	1.99569e-52	0.001		-0.490756	0.00308455	0.0270187	0.009
PRAD	cg14962032	2	202122669	56813	3	AP	CASP8	-0.16888	1.12299e-08	1.52479e-08	0.001		0.126567	0.475675	0.6864	0.469
PRAD	cg15245437	X	153072605	90509	3.1:3.2:5	ES	PDZD4	0.296447	1.2646e-08	1.70147e-08	0.001		0.0398698	0.840361	0.901256	0.815
PRAD	cg15352367	22	36236732	61982	3	AP	RBFOX2	-0.460051	3.94195e-64	2.91704e-62	0.001		-0.217647	0.208339	0.404204	0.235
PRAD	cg15525848	5	16509123	71599	4	AP	FAM134B	-0.488114	3.71872e-15	6.71183e-15	0.001		-0.154773	0.37467	0.589905	0.374
PRAD	cg15610027	18	32173227	45092	2	AP	DTNA	-0.568823	2.20903e-45	2.97215e-44	0.001		-0.256226	0.14327	0.326216	0.149
PRAD	cg15826437	17	38334186	40846	2	AP	RAPGEFL1	-0.197202	1.29869e-05	1.56265e-05	0.001		0.226786	0.197121	0.399642	0.206
PRAD	cg16374457	17	57059840	42721	26	AT	TRIM37	0.274945	4.19438e-05	4.88794e-05	0.001		0.176471	0.309251	0.526083	0.341
PRAD	cg16473141	14	24641501	26881	1.2	RI	REC8	0.557463	4.13863e-11	5.94677e-11	0.001		0.156863	0.366734	0.583619	0.371
PRAD	cg16731240	19	52391250	51380	1.3	RI	ZNF577	0.1322	3.5524e-13	5.59313e-13	0.001		0.264421	0.124787	0.307299	0.125
PRAD	cg15664152	7	129008407	81744	3	AP	AHCYL2	-0.748438	2.06955e-19	5.10489e-19	0.001		-0.680242	4.04204e-05	0.00136315	<0.001
PRAD	cg15820273	5	96038348	72838	6	AP	CAST	-0.379406	1.22159e-36	7.53312e-36	0.001		-0.539819	0.000817284	0.0112303	<0.001
PRAD	cg16927871	3	25469991	63744	2.1	AP	RARB	-0.831326	8.04398e-35	4.40929e-34	0.001		-0.227672	0.195329	0.399642	0.198
PRAD	cg17192679	X	103217238	89790	2.2:2.3	AD	TMSB15B	0.533136	1.94818e-26	6.86502e-26	0.001		0.212325	0.219891	0.406799	0.238
PRAD	cg17386265	X	137794000	90232	4	AP	FGF13	-0.0968497	1.34636e-14	2.34425e-14	0.001		-0.111851	0.522368	0.714904	0.507
PRAD	cg17974515	1	2252516	253	17	AT	MORN1	-0.272111	0.00217833	0.002424	0.001		0.0411765	0.813952	0.892332	0.808
PRAD	cg18029321	5	140230326	73785	1.2	AT	PCDHA9	0.273079	4.0608e-05	4.76983e-05	0.002		-0.195416	0.266915	0.463141	0.249
PRAD	cg17133446	22	26961427	61518	3	AP	TPST2	-0.451014	8.24115e-48	1.35521e-46	0.001		-0.609566	0.000129878	0.00274599	<0.001
PRAD	cg18114036	1	156260918	8222	7	AT	C1orf85	-0.316826	5.24243e-20	1.33772e-19	0.001		-0.0515406	0.768132	0.87178	0.775
PRAD	cg18270675	11	85422118	18148	13	ES	SYTL2	0.202009	4.40899e-07	5.67418e-07	0.001		0.100007	0.567594	0.756792	0.539
PRAD	cg18420599	18	32173206	45092	2	AP	DTNA	-0.606206	3.66863e-39	3.61972e-38	0.001		-0.266005	0.128223	0.307299	0.136
PRAD	cg18512948	14	24641706	26881	1.2	RI	REC8	0.535332	2.29398e-11	3.39509e-11	0.001		0.0481826	0.783424	0.87178	0.777
PRAD	cg18582992	15	45479642	30409	3	AP	SHF	-0.546998	5.63289e-26	1.8947e-25	0.001		-0.306162	0.0740197	0.214802	0.066
PRAD	cg18773129	22	19938916	61096	3	AP	COMT	-0.312411	8.33794e-30	3.24741e-29	0.001		-0.146448	0.401204	0.625034	0.391
PRAD	cg19472078	17	77020166	43985	2.1	AP	C1QTNF1	-0.0933084	0.02377	0.0249501	0.021		-0.289116	0.0920841	0.24779	0.097
PRAD	cg19585556	7	18535332	78887	4	AP	HDAC9	-0.560269	3.79111e-20	9.84358e-20	0.001		-0.341775	0.0515689	0.159004	0.059
PRAD	cg19627006	2	85637673	54272	2	AP	CAPG	0.626503	1.6734e-28	6.19158e-28	0.001		-0.00168067	0.992953	0.992953	0.995
PRAD	cg20150640	1	23697656	1054	1.5	RI	C1orf213	0.209903	6.91521e-06	8.38894e-06	0.001		-0.049023	0.779739	0.87178	0.807
PRAD	cg18613324	22	36236760	61982	3	AP	RBFOX2	-0.495302	4.19076e-58	2.06744e-56	0.001		-0.632086	8.73754e-05	0.00215526	<0.001
PRAD	cg20414935	1	6445872	391	2	AP	ACOT7	-0.315082	1.09489e-15	2.10447e-15	0.001		-0.119608	0.492261	0.688495	0.479
PRAD	cg21437561	4	187026872	71398	2	AP	FAM149A	-0.408173	1.18434e-17	2.69664e-17	0.001		-0.140336	0.419851	0.640597	0.444
PRAD	cg21635917	5	96038401	72838	6	AP	CAST	-0.306942	9.44108e-37	6.35127e-36	0.001		-0.290228	0.0907843	0.24779	0.094
PRAD	cg22018051	1	154943349	7855	2.1	AP	SHC1	-0.266237	3.46426e-11	5.07634e-11	0.001		-0.0453813	0.795741	0.878879	0.803
PRAD	cg19676238	1	2342094	269	2	ES	PEX10	-0.819189	1.63919e-16	3.32329e-16	0.001		-0.490476	0.0031035	0.0270187	0.008
PRAD	cg22082706	11	70001938	17387	17	ES	ANO1	0.34332	6.5374e-14	1.06323e-13	0.001		0.352125	0.0380317	0.1309	0.03
PRAD	cg22257574	9	135754383	87992	2	AP	C9orf9	-0.376258	2.30116e-14	3.82665e-14	0.001		0.158179	0.364119	0.583619	0.357
PRAD	cg20666386	11	46367100	15541	2	AP	DGKZ	-0.810124	3.44517e-48	6.37357e-47	0.001		-0.484594	0.00352576	0.0274638	0.003
PRAD	cg22502492	1	23697506	1054	1.5	RI	C1orf213	0.206957	5.33625e-08	6.98908e-08	0.001		-0.0726993	0.678124	0.816939	0.689
PRAD	cg20988073	3	125900093	66578	2	AP	ALDH1L1	-0.170591	3.21769e-19	7.68093e-19	0.001		-0.546107	0.000834683	0.0112303	0.001
PRAD	cg21244086	15	45479462	30409	3	AP	SHF	-0.783382	9.63147e-31	3.85259e-30	0.001		-0.648459	3.86748e-05	0.00136315	<0.001
PRAD	cg23010048	19	52391257	51380	1.3	RI	ZNF577	0.145108	9.0956e-15	1.60256e-14	0.001		0.21501	0.214832	0.406174	0.224
PRAD	cg21601837	3	125900065	66578	2	AP	ALDH1L1	-0.143969	1.48797e-17	3.33666e-17	0.001		-0.540718	0.00114342	0.0115266	0.003
PRAD	cg23882545	2	202122653	56813	3	AP	CASP8	-0.152221	2.52757e-08	3.3701e-08	0.001		0.0716851	0.687039	0.820014	0.67
PRAD	cg23965061	8	22960599	83065	4.3	AT	TNFRSF10C	0.491029	2.05292e-17	4.40336e-17	0.001		0.302246	0.0776126	0.220897	0.087
PRAD	cg24059154	11	5646103	14068	2	AP	TRIM34	-0.519466	1.53656e-17	3.3942e-17	0.001		-0.23571	0.17284	0.37073	0.179
PRAD	cg24401557	X	137793853	90232	4	AP	FGF13	-0.101142	1.41323e-14	2.43207e-14	0.001		-0.2507	0.146331	0.328136	0.141
PRAD	cg24742349	5	96038614	72838	6	AP	CAST	-0.347907	2.9825e-34	1.45069e-33	0.001		-0.261783	0.128733	0.307299	0.112
PRAD	cg24794228	19	52391166	51380	1.3	RI	ZNF577	0.132152	2.57182e-15	4.75786e-15	0.001		0.284293	0.0978895	0.255836	0.086
PRAD	cg23212751	1	44401433	2483	4.1	AP	ARTN	-0.869697	2.4885e-35	1.41653e-34	0.001		-0.47395	0.00441834	0.0297234	0.002
PRAD	cg25620356	7	18535407	78887	4	AP	HDAC9	-0.645469	1.83896e-22	5.44333e-22	0.001		-0.32498	0.0607479	0.179814	0.067
PRAD	cg25645840	X	137794009	90232	4	AP	FGF13	-0.110274	2.28687e-15	4.28426e-15	0.001		-0.124054	0.477697	0.6864	0.461
PRAD	cg25783099	2	42795486	53362	4	AP	MTA3	-0.362504	7.59686e-09	1.05078e-08	0.001		-0.0780221	0.655957	0.809014	0.65
PRAD	cg25813864	17	38334176	40846	2	AP	RAPGEFL1	-0.202522	6.11255e-07	7.79877e-07	0.001		0.0631789	0.722613	0.835745	0.728
PRAD	cg25836061	22	19939028	61096	3	AP	COMT	-0.570467	3.03093e-38	2.63869e-37	0.001		-0.125799	0.471478	0.6864	0.436
PRAD	cg26074140	1	44401309	2483	4.1	AP	ARTN	-0.767281	1.83785e-26	6.6342e-26	0.001		-0.358543	0.0350815	0.1309	0.034
PRAD	cg25349276	4	41614591	69111	10.1	AP	LIMCH1	-0.0545059	0.000710533	0.00080274	0.003		-0.609167	0.000178611	0.00330431	<0.001
PRAD	cg26196531	22	36236656	61982	3	AP	RBFOX2	-0.671807	4.26386e-53	9.01502e-52	0.001		-0.110364	0.526517	0.714904	0.525
PRAD	cg26476820	2	85637851	54272	2	AP	CAPG	0.714537	2.77999e-31	1.24678e-30	0.001		-0.0680672	0.696719	0.821983	0.701
PRAD	cg27054514	1	2252995	253	17	AT	MORN1	-0.207414	0.00536905	0.00584279	0.004		0.0123258	0.943975	0.970197	0.945
PRAD	cg27139457	2	85637739	54272	2	AP	CAPG	0.430204	0.000219466	0.00025179	0.001		-0.218207	0.207149	0.404204	0.188
PRAD	cg27534599	22	17680477	60971	6	AP	CECR1	-0.694714	1.69686e-12	2.58903e-12	0.001		-0.0921596	0.604191	0.769379	0.627
PRAD	cg27652893	4	187026970	71398	2	AP	FAM149A	-0.350322	4.8498e-15	8.64784e-15	0.001		-0.213725	0.216809	0.406174	0.223
PRAD	cg00060374	1	1355235	168	1.4:2	ES	ANKRD65	0.375453	3.54425e-11	5.14264e-11	0.001		-0.0176471	0.920049	0.953997	0.925
PRAD	cg20150640	1	23697656	1055	1.3	RI	C1orf213	0.141666	0.00254203	0.00280762	0.005		0.171989	0.321853	0.541299	0.3
PRAD	cg20150640	1	23697656	1056	1.2:1.3	RI	C1orf213	0.259093	1.21912e-06	1.51622e-06	0.001		-0.00308123	0.986547	0.992953	0.987
PRAD	cg02564134	3	125899754	66577	3	AP	ALDH1L1	-0.648008	1.37726e-34	7.02877e-34	0.001		-0.194988	0.269122	0.463141	0.28
PRAD	cg27067214	5	96038311	72838	6	AP	CAST	-0.399734	3.70775e-38	3.04859e-37	0.001		-0.526161	0.00116824	0.0115266	0.002
PRAD	cg04470878	17	74086431	43572	8.2	ES	EXOC7	0.293036	3.58649e-08	4.73929e-08	0.001		-0.354622	0.0372395	0.1309	0.046
PRAD	cg27178401	16	10652711	33987	2	AP	EMP2	-0.284281	2.41398e-19	5.85687e-19	0.001		-0.717588	1.22527e-06	0.00018134	<0.001
PRAD	cg27445278	22	26961465	61518	3	AP	TPST2	-0.416936	1.64171e-41	2.02478e-40	0.001		-0.66305	1.92712e-05	0.00136315	<0.001
PRAD	cg04470878	17	74086431	43565	8.1:8.2	ES	EXOC7	0.184554	0.0081307	0.00878353	0.008		0.239776	0.16487	0.358835	0.172
PRAD	cg03562414	19	52391078	51380	1.3	RI	ZNF577	0.126492	8.86752e-16	1.74986e-15	0.001		0.225875	0.191995	0.399642	0.192
PRAD	cg10635122	19	52391090	51380	1.3	RI	ZNF577	0.140047	3.25484e-17	6.78473e-17	0.001		0.373551	0.027077	0.108308	0.029
PRAD	cg10783469	19	52391234	51381	1.2:1.3	RI	ZNF577	0.333935	1.17475e-34	6.20938e-34	0.001		0.3828	0.0232285	0.0954951	0.026
PRAD	cg16731240	19	52391250	51381	1.2:1.3	RI	ZNF577	0.277433	1.61741e-28	6.13788e-28	0.001		0.417565	0.0125662	0.0599932	0.017
PRAD	cg23010048	19	52391257	51381	1.2:1.3	RI	ZNF577	0.311797	3.03861e-34	1.45069e-33	0.001		0.432943	0.0093828	0.0514316	0.014
PRAD	cg24794228	19	52391166	51381	1.2:1.3	RI	ZNF577	0.277907	4.71455e-34	2.18048e-33	0.001		0.433954	0.0092001	0.0514316	0.011
PRAD	cg04470878	17	74086431	43566	8.2	ES	EXOC7	0.111822	0.0236174	0.0249501	0.022		0.0383499	0.829236	0.901256	0.829
PRAD	cg09757109	11	111848638	18707	8	AP	DIXDC1	-0.092083	0.0183181	0.0195042	0.018		-0.217102	0.210295	0.404204	0.221
THCA	cg02126235	14	94855034	29123	2.1:2.2:2.3	AA	SERPINA1	-0.516656	4.28859e-63	4.88899e-62	0.001		-0.438976	0.00255597	0.0161878	0.001
THCA	cg02937491	18	55888790	45649	6	AP	NEDD4L	-0.798295	1.6402e-18	4.2496e-18	0.001		-0.321377	0.0228614	0.0833834	0.02
THCA	cg03198269	12	108028454	24189	13	AP	BTBD11	-0.659474	9.18525e-07	1.41502e-06	0.001		-0.319375	0.0237734	0.0833834	0.016
THCA	cg05346611	14	94855088	29123	2.1:2.2:2.3	AA	SERPINA1	-0.582263	2.15927e-64	3.07697e-63	0.001		-0.401845	0.00657015	0.0340453	0.005
THCA	cg05538432	12	7167751	20067	5	AP	C1S	-0.512026	8.36982e-07	1.32522e-06	0.001		-0.0659816	0.648925	0.807678	0.675
THCA	cg06098276	17	76171208	43786	6.2	RI	TK1	-0.126571	0.00399287	0.0054189	0.004		-0.471687	0.00212235	0.0151217	0.003
THCA	cg07048623	12	108028560	24189	13	AP	BTBD11	-0.554961	2.4788e-07	4.15564e-07	0.001		-0.317054	0.0248687	0.0833834	0.021
THCA	cg07195469	X	153637739	90575	3.1	AP	DNASE1L1	-0.432952	7.30261e-49	3.78408e-48	0.001		-0.124325	0.389669	0.584504	0.413
THCA	cg08530859	8	143851287	85361	7	AP	LYNX1	-0.506315	0.00434766	0.00576318	0.004		0.142996	0.326997	0.503752	0.311
THCA	cg09968361	14	94855344	29123	2.1:2.2:2.3	AA	SERPINA1	-0.432088	4.70088e-59	4.46583e-58	0.001		-0.504875	0.000481188	0.00914257	0.001
THCA	cg10381771	10	97515398	12652	2	AP	ENTPD1	-0.343624	6.2626e-20	1.78484e-19	0.001		0.156968	0.297511	0.483933	0.284
THCA	cg11066033	2	242556858	58392	3	AP	THAP4	-0.808476	6.01851e-19	1.6336e-18	0.001		-0.293253	0.0391379	0.101403	0.029
THCA	cg13471990	10	97515222	12652	2	AP	ENTPD1	-0.257404	9.99049e-08	1.72563e-07	0.001		0.326015	0.02703	0.0855949	0.026
THCA	cg13826459	14	94855505	29123	2.1:2.2:2.3	AA	SERPINA1	-0.202622	3.9878e-08	7.3324e-08	0.001		-0.285253	0.057517	0.131139	0.07
THCA	cg15602548	2	54786148	53577	3	AP	SPTBN1	-0.801602	1.70421e-09	3.34966e-09	0.001		-0.463583	0.00132209	0.0137719	0.001
THCA	cg15730481	7	1126318	78565	2	AP	GPER1	-0.622245	6.26293e-31	1.87888e-30	0.001		-0.0910051	0.529654	0.736349	0.575
THCA	cg16066219	10	114135054	13109	2	AP	ACSL5	-0.461517	4.124e-10	8.39529e-10	0.001		-0.165938	0.264967	0.457671	0.266
THCA	cg16331051	2	75788552	54148	2	AP	EVA1A	-0.494195	0.000624726	0.000868521	0.001		-0.0127149	0.931647	0.957658	0.919
THCA	cg16576811	18	55888640	45649	6	AP	NEDD4L	-0.761548	1.78918e-18	4.43405e-18	0.001		-0.432857	0.00169159	0.0137744	0.004
THCA	cg17333291	7	1126326	78565	2	AP	GPER1	-0.777581	4.23195e-31	1.34012e-30	0.001		0.0759238	0.60025	0.79568	0.614
THCA	cg18184218	10	24755438	10994	10	AP	KIAA1217	-1.03715	1.89151e-33	6.34214e-33	0.001		-0.393833	0.00561362	0.0319976	0.006
THCA	cg18733757	10	114134878	13109	2	AP	ACSL5	-0.510695	1.06435e-06	1.55559e-06	0.001		-0.0809985	0.588345	0.79568	0.582
THCA	cg18781966	19	51523159	51263	3	AP	KLK10	-0.861276	6.96477e-11	1.47034e-10	0.001		-0.293829	0.0383498	0.101403	0.031
THCA	cg19733736	12	56115029	22237	2.1:2.2	AA	RDH5	0.277846	0.0236596	0.0299688	0.024		-0.264126	0.305642	0.483933	0.32
THCA	cg20329959	X	153637607	90575	3.1	AP	DNASE1L1	-0.392424	6.29776e-49	3.58972e-48	0.001		-0.245294	0.0859865	0.181527	0.073
THCA	cg20847746	1	153600865	7733	4	AP	S100A13	-0.272602	5.15706e-06	7.34881e-06	0.001		-0.0460035	0.751066	0.856215	0.738
THCA	cg21153181	X	153637497	90575	3.1	AP	DNASE1L1	-0.415127	3.80612e-57	3.09927e-56	0.001		-0.107955	0.455526	0.649124	0.468
THCA	cg21171115	9	112887903	87176	9	AP	AKAP2	-0.538196	4.10123e-12	8.99116e-12	0.001		-0.0281838	0.852224	0.934169	0.827
THCA	cg21201393	5	38445522	71837	20.1	AP	EGFLAM	0.414554	0.034311	0.0425158	0.036		0.181246	0.217632	0.400163	0.218
THCA	cg21459545	X	153637814	90575	3.1	AP	DNASE1L1	-0.405954	7.81244e-46	3.71091e-45	0.001		-0.173498	0.228224	0.406523	0.221
THCA	cg22562219	X	153637700	90575	3.1	AP	DNASE1L1	-0.579488	4.54442e-52	3.2379e-51	0.001		-0.261957	0.0661059	0.144925	0.066
THCA	cg23387422	X	153637603	90575	3.1	AP	DNASE1L1	-0.421929	7.54018e-36	2.68619e-35	0.001		-0.155394	0.281225	0.471466	0.277
THCA	cg24129222	2	74643251	54051	2.1	AP	C2orf81	-0.388041	1.62762e-08	3.09248e-08	0.001		-0.280672	0.0486852	0.115627	0.043
THCA	cg24652919	16	3073191	33353	3.1	AA	HCFC1R1	-0.24305	5.38789e-07	8.77456e-07	0.001		-0.281008	0.0480644	0.115627	0.046
THCA	cg24834461	X	153637645	90575	3.1	AP	DNASE1L1	-0.549196	6.14644e-52	3.89274e-51	0.001		-0.0593051	0.682463	0.810425	0.672
THCA	cg25069807	17	76171191	43786	6.2	RI	TK1	-0.125766	0.00489167	0.00633694	0.007		-0.4867	0.00144967	0.0137719	0.002
THCA	cg25091228	5	67586433	72291	9	AP	PIK3R1	-0.703625	2.34219e-15	5.56269e-15	0.001		-0.210344	0.155856	0.317279	0.152
THCA	cg25780389	10	114134915	13109	2	AP	ACSL5	-0.393186	5.72305e-08	1.01942e-07	0.001		-0.203651	0.169752	0.33365	0.168
THCA	cg02126235	14	94855034	29115	2.1:2.2:2.3:2.4	AA	SERPINA1	-0.416862	3.76225e-45	1.53177e-44	0.001		-0.3172	0.0359043	0.101403	0.04
THCA	cg02126235	14	94855034	29130	2.1:2.2:2.3:2.4:2.5	ES	SERPINA1	-1.14901	2.54068e-128	7.24095e-127	0.001		-0.502725	0.000198779	0.00566519	<0.001
THCA	cg05346611	14	94855088	29115	2.1:2.2:2.3:2.4	AA	SERPINA1	-0.465985	3.04861e-45	1.3367e-44	0.001		-0.19711	0.199681	0.379393	0.213
THCA	cg05346611	14	94855088	29130	2.1:2.2:2.3:2.4:2.5	ES	SERPINA1	-1.23877	7.66776e-123	1.45687e-121	0.001		-0.44684	0.00114185	0.0137719	0.001
THCA	cg09968361	14	94855344	29115	2.1:2.2:2.3:2.4	AA	SERPINA1	-0.351966	1.43309e-43	5.44574e-43	0.001		-0.351569	0.0192755	0.0833834	0.023
THCA	cg09968361	14	94855344	29130	2.1:2.2:2.3:2.4:2.5	ES	SERPINA1	-1.02896	3.0442e-140	1.7352e-138	0.001		-0.643872	4.55089e-07	2.59401e-05	<0.001
THCA	cg13826459	14	94855505	29115	2.1:2.2:2.3:2.4	AA	SERPINA1	-0.167415	1.02528e-06	1.53792e-06	0.001		-0.0241813	0.876186	0.939953	0.872
THCA	cg13826459	14	94855505	29130	2.1:2.2:2.3:2.4:2.5	ES	SERPINA1	-0.573752	4.99919e-15	1.13982e-14	0.001		-0.298605	0.0351722	0.101403	0.037
β: the regression coefficient ofcovariance analysis model. r: the Spearman's correlation coefficient

## Sheet: Tab S5
Tab S5.GO biological processes that were enriched by genes harboring differentially regulated exon in 10 human cancers
Tumor Type	ONTOLOGY	ID	Description	GeneRatio	BgRatio	pvalue	p.adjust	qvalue	geneID	Count
COAD	CC	GO:0042383	sarcolemma	3/18	125/18678	0.000221857	0.0137207	0.0108321	AQP1/OBSCN/ANK3	3
COAD	CC	GO:0009925	basal plasma membrane	2/18	28/18678	0.000326684	0.0137207	0.0108321	AQP1/ANK3	2
COAD	CC	GO:0045178	basal part of cell	2/18	45/18678	0.000847339	0.0237255	0.0187307	AQP1/ANK3	2
HNSC	BP	GO:0045785	positive regulation of cell adhesion	7/43	388/17913	3.48527e-05	0.0398714	0.031881	NCK1/CCL28/RARA/BCL6/HYAL1/EGFLAM/PIK3R1	7
LIHC	BP	GO:0050999	regulation of nitric-oxide synthase activity	2/7	51/17913	0.000165381	0.0337818	0.0172994	CYGB/NPR3	2
LIHC	BP	GO:0032768	regulation of monooxygenase activity	2/7	64/17913	0.000260863	0.0337818	0.0172994	CYGB/NPR3	2
LIHC	CC	GO:0042383	sarcolemma	2/7	125/18678	0.000912784	0.0237324	0.0124907	PEMT/FXYD1	2
LIHC	CC	GO:0005890	sodium:potassium-exchanging ATPase complex	1/7	11/18678	0.00411588	0.0453775	0.0238829	FXYD1	1
LIHC	CC	GO:0090533	cation-transporting ATPase complex	1/7	14/18678	0.00523587	0.0453775	0.0238829	FXYD1	1
LIHC	CC	GO:0098533	ATPase dependent transmembrane transport complex	1/7	20/18678	0.00747261	0.048572	0.0255642	FXYD1	1
LUAD	BP	GO:0045760	positive regulation of action potential	2/12	12/17913	2.70513e-05	0.0128494	0.00797303	ANK3/ADRA1A	2
LUAD	BP	GO:0003014	renal system process	3/12	120/17913	6.17199e-05	0.0146585	0.00909556	EMP2/ADRA1A/PRKAR1B	3
LUAD	BP	GO:0071709	membrane assembly	2/12	32/17913	0.000201787	0.0319496	0.0198247	EMP2/ANK3	2
LUAD	BP	GO:0044091	membrane biogenesis	2/12	37/17913	0.000270444	0.0321152	0.0199275	EMP2/ANK3	2
LUAD	CC	GO:0030315	T-tubule	2/12	51/18678	0.000474078	0.0236639	0.0117628	ANK3/ADRA1A	2
LUAD	CC	GO:0016324	apical plasma membrane	3/12	300/18678	0.000810501	0.0236639	0.0117628	EMP2/SLC9A3R2/STXBP2	3
LUAD	CC	GO:0098589	membrane region	3/12	321/18678	0.000985995	0.0236639	0.0117628	EMP2/ADRA1A/BICD2	3
LUAD	CC	GO:0045177	apical part of cell	3/12	365/18678	0.00142817	0.025707	0.0127783	EMP2/SLC9A3R2/STXBP2	3
LUAD	CC	GO:0030018	Z disc	2/12	106/18678	0.00202899	0.0288673	0.0143493	ANK3/ADRA1A	2
LUAD	CC	GO:0031674	I band	2/12	116/18678	0.00242321	0.0288673	0.0143493	ANK3/ADRA1A	2
LUAD	CC	GO:0042383	sarcolemma	2/12	125/18678	0.00280654	0.0288673	0.0143493	ANK3/ADRA1A	2
LUAD	CC	GO:0030017	sarcomere	2/12	174/18678	0.00535604	0.0431882	0.0214678	ANK3/ADRA1A	2
LUAD	CC	GO:0044449	contractile fiber part	2/12	192/18678	0.00648328	0.0431882	0.0214678	ANK3/ADRA1A	2
LUAD	CC	GO:0030016	myofibril	2/12	197/18678	0.00681409	0.0431882	0.0214678	ANK3/ADRA1A	2
LUAD	CC	GO:0042589	zymogen granule membrane	1/12	11/18678	0.00704636	0.0431882	0.0214678	STXBP2	1
LUAD	CC	GO:0043292	contractile fiber	2/12	209/18678	0.007639	0.0431882	0.0214678	ANK3/ADRA1A	2
LUAD	CC	GO:0042588	zymogen granule	1/12	14/18678	0.00896018	0.0431882	0.0214678	STXBP2	1
LUAD	CC	GO:0098691	dopaminergic synapse	1/12	14/18678	0.00896018	0.0431882	0.0214678	ADRA1A	1
LUAD	CC	GO:0033268	node of Ranvier	1/12	15/18678	0.00959737	0.0431882	0.0214678	ANK3	1
LUAD	CC	GO:0043194	axon initial segment	1/12	15/18678	0.00959737	0.0431882	0.0214678	ANK3	1
LUAD	CC	GO:0043034	costamere	1/12	18/18678	0.0115067	0.0487342	0.0242246	ANK3	1
LUAD	MF	GO:0050839	cell adhesion molecule binding	4/12	444/16969	0.00019371	0.00910437	0.00448592	EMP2/SLC9A3R2/ANK3/DOCK9	4
LUAD	MF	GO:0045296	cadherin binding	3/12	297/16969	0.00103858	0.0244067	0.0120257	SLC9A3R2/ANK3/DOCK9	3
THCA	MF	GO:0042562	hormone binding	2/10	81/16969	0.000987898	0.037616	0.0173231	GPER1/PIK3R1	2
THCA	MF	GO:0003996	acyl-CoA ligase activity	1/10	10/16969	0.00587905	0.037616	0.0173231	ACSL5	1
THCA	MF	GO:0005068	transmembrane receptor protein tyrosine kinase adaptor activity	1/10	10/16969	0.00587905	0.037616	0.0173231	PIK3R1	1
THCA	MF	GO:0005165	neurotrophin receptor binding	1/10	10/16969	0.00587905	0.037616	0.0173231	PIK3R1	1
THCA	MF	GO:0033130	acetylcholine receptor binding	1/10	10/16969	0.00587905	0.037616	0.0173231	LYNX1	1
THCA	MF	GO:0036312	phosphatidylinositol 3-kinase regulatory subunit binding	1/10	10/16969	0.00587905	0.037616	0.0173231	PIK3R1	1
THCA	MF	GO:0043560	insulin receptor substrate binding	1/10	10/16969	0.00587905	0.037616	0.0173231	PIK3R1	1
THCA	MF	GO:0004467	long-chain fatty acid-CoA ligase activity	1/10	11/16969	0.00646524	0.037616	0.0173231	ACSL5	1
THCA	MF	GO:0030548	acetylcholine receptor regulator activity	1/10	11/16969	0.00646524	0.037616	0.0173231	LYNX1	1
THCA	MF	GO:0050786	RAGE receptor binding	1/10	11/16969	0.00646524	0.037616	0.0173231	S100A13	1
THCA	MF	GO:0099602	neurotransmitter receptor regulator activity	1/10	11/16969	0.00646524	0.037616	0.0173231	LYNX1	1
THCA	MF	GO:0004745	retinol dehydrogenase activity	1/10	14/16969	0.00822195	0.0402601	0.0185408	RDH5	1
THCA	MF	GO:0015645	fatty acid ligase activity	1/10	14/16969	0.00822195	0.0402601	0.0185408	ACSL5	1
THCA	MF	GO:0005159	insulin-like growth factor receptor binding	1/10	15/16969	0.0088069	0.0402601	0.0185408	PIK3R1	1
THCA	MF	GO:0005158	insulin receptor binding	1/10	20/16969	0.011727	0.0463438	0.0213425	PIK3R1	1
THCA	MF	GO:0017134	fibroblast growth factor binding	1/10	21/16969	0.0123101	0.0463438	0.0213425	S100A13	1
THCA	MF	GO:0030547	receptor inhibitor activity	1/10	21/16969	0.0123101	0.0463438	0.0213425	LYNX1	1

## Sheet: Tab S6
Tab S6.KEGG pathway enrichment of genes with methylation-related cancer-specific AS across 10 human cancer typess
Tumor Type	ID	Description	GeneRatio	BgRatio	pvalue	p.adjust	qvalue	geneID	Count
LIHC	hsa00564	Glycerophospholipid metabolism	1/1	97/7915	0.0243618	0.0487235	0.025644	10400	1
